1

2 **Characterisation of the pathogenicity of strains of *Pseudomonas syringae* towards cherry and**  
3 **plum**

4

5 Hulin M.T., Mansfield J.W., Brain, P., Xiangming, X., Jackson R.W. and Harrison R.J.\*

6

7 NIAB EMR, New Road, East Malling, ME19 6BJ

8 Faculty of Natural Sciences, Imperial College London, London SW7 2AZ, UK

9 School of Biological Sciences, University of Reading, Reading, RG6 6AJ, U.K.

10 **Corresponding author** – richard.harrison@emr.ac.uk

11

12 **Running head-** Pseudomonas pathogenicity

13

14 **Key words-** Pseudomonas, pathogenicity, avirulence, non-host

15

16

17

18

19 **Abstract**

20 Bacterial canker is a major disease of cherry and other stone fruits caused by several pathovars of  
21 *Pseudomonas syringae*. These are *P.s* pv. *morsprunorum* race 1 (*Psm* R1), *P.s* pv. *morsprunorum*  
22 race 2 (*Psm* R2) and *P.s* pv. *syringae* (*Pss*). *Psm* R1 and R2 were originally designated as races of  
23 the same pathovar, however phylogenetic analysis has revealed them to be distantly related. This  
24 study characterised the pathogenicity of *P. syringae* on cherry and plum, in the field and the  
25 laboratory. The field experiment identified variation in host cultivar susceptibility to the different  
26 pathogen clades. The cherry cultivar Merton Glory exhibited a broad resistance to all clades, whilst  
27 cultivar Van showed race-specific resistance. *Psm* R1 may be divided into a race structure with  
28 some strains pathogenic to both cherry and plum and others only pathogenic to plum. The results of  
29 laboratory-based pathogenicity tests were compared to results obtained on whole-trees. Only cut  
30 shoot inoculations were found to be sensitive enough to detect cultivar variation in susceptibility.  
31 Measuring population growth of bacteria in detached leaves reliably discriminated pathogens from  
32 non-pathogens. In addition, symptom appearance discriminated *Psm* races from non-pathogens  
33 which triggered a rapid hypersensitive response (HR). The pathogen *Pss* rapidly induced disease  
34 lesions and therefore may exhibit a more necrotrophic lifestyle than hemi-biotrophic *Psm* races.  
35 This in-depth study of pathogenic interactions, identification of host resistance and optimisation of  
36 laboratory assays, will provide a framework for future genetic dissection of virulence and host  
37 resistance mechanisms.

38

39

40

41

42

43

44

45

## 46 **Introduction**

47

48 *Pseudomonas syringae* is a globally important plant pathogen, and includes strains associated with  
49 plants and aquatic environments (Dudnik & Dudler, 2014). Plant pathogenic strains can be divided  
50 into pathovars, which are only able to infect particular host species. Strains within pathovars can  
51 also be further distinguished into races, which show specificity towards particular host cultivars  
52 (Joardar *et al.*, 2005). *P. syringae* is referred to as a species complex due to the high level of  
53 divergence between individual clades (Berge *et al.*, 2014). Currently, nine genomospecies, based on  
54 DNA-DNA hybridisation, and thirteen phylogroups, based on Multi-Locus Sequence Typing  
55 (MLST), have been described (Gardan *et al.*, 1999; Parkinson *et al.*, 2011).

56

57 Several distantly related pathovars of *P. syringae*, which belong to different phylogroups, are  
58 known to cause bacterial canker of *Prunus*. This genus of stone-fruit trees includes economically  
59 important species such as cherry, plum, peach and apricot. Focusing on sweet cherry (*Prunus*  
60 *avium*), members within three distinct phylogroups of *P. syringae* have been characterised as the  
61 main causal agents of canker. These are *P. syringae* pv. *syringae* (*Pss*), *P. syringae* pv.  
62 *morsprunorum* (*Psm*) race 1 (R1) and *P. syringae* pv. *morsprunorum* race 2 (R2) (Bultreys &  
63 Kaluzna, 2010). The two *morsprunorum* races are specifically found only on *Prunus* species, whilst  
64 *Pss* strain are more variable and able to infect various plant species (Bultreys & Kaluzna, 2010).  
65 Although distantly related, *Psm* R1 and R2 were initially distinguished based on virulence towards  
66 particular cherry cultivars, so were described as races of pv. *morsprunorum* (Garrett, 1978).  
67 Another pathovar (*P. syringae* pv. *avii*) is pathogenic on wild cherry (Ménard *et al.*, 2003). *P.*  
68 *syringae* is able to infect throughout the year and cause necrotic lesions on all aerial plant organs,  
69 including fruit, leaves and blossom. The pathovars invade dormant woody tissues through leaf scars  
70 and wounds in winter. They occupy the cambial tissue and produce black necrotic cankers in spring.  
71 During the growing period, there is a large diverse population of epiphytic bacteria that grow on the

72 surface of the leaves. Bacteria may also enter the leaf and induce necrotic lesions that eventually  
73 drop out of the leaf, causing shot-hole symptoms. The asymptomatic leaf population are thought to  
74 provide the inoculum for woody tissue infections (Crosse, 1959). Bacterial canker is an annual  
75 problem for the global cherry fruit industry and is particularly devastating in young orchards, where  
76 it has been reported to cause up to 75% loss of trees (Spotts *et al.*, 2010). Chemical control for this  
77 disease is currently limited to spraying with copper-based compounds, a treatment that has recently  
78 been restricted across Europe (Stone & Baker, 2010). Breeding for resistance is a desirable  
79 alternative method of control. Recent studies have identified rootstock selections and scion varieties  
80 exhibiting a degree of resistance (Santi *et al.* 2004; Spotts *et al.* 2010; Li *et al.* 2015; Farhadfar *et*  
81 *al.* 2016). Despite this progress, there is still a lack of totally resistant varieties available and the  
82 genetic factors underlying canker resistance remain unknown.

83

84 An understanding of how the divergent clades of *P. syringae* cause bacterial canker is crucial to  
85 breeding efforts. The epidemiology of this disease was determined through field inoculation studies  
86 at East Malling in the UK (Crosse, 1966; Crosse & Garrett, 1966; Freigoun & Crosse, 1975;  
87 Garrett, 1978). Molecular techniques such as Repetitive Element Sequence-Based (REP) PCR and  
88 Multi-Locus Sequence Typing (MLST) and various morphological methods have been used to  
89 survey the bacterial populations in orchards (Vicente & Roberts, 2007; Gilbert *et al.*, 2008; Kaluzna  
90 *et al.*, 2010). These studies revealed that the three pathovars co-exist within orchards, with each  
91 other and non-pathogenic Pseudomonads. To characterise pathogenicity, several laboratory and  
92 field-based assays have been developed (Crosse & Garrett 1966; Vicente & Roberts 2003; Gilbert  
93 *et al.* 2009). Improved assays are required for screening for host resistance. Gilbert *et al.* (2009)  
94 used various lab-based tests to determine the pathogenicity of strains isolated from stone-fruits in  
95 Belgium. They found that no individual laboratory assay could reliably predict pathogenicity under  
96 field conditions. Field inoculations are therefore required to fully ascertain pathogenicity and  
97 differences in host response.

98

99 The breeding of resistant cherry cultivars has been hindered due to the complex nature of this  
100 disease (Garrett, 1979). Early work reported variation in cultivar susceptibility towards the  
101 different clades of pathogenic *P. syringae*, with two cultivars Napoleon and Roundel exhibiting  
102 differential susceptibility towards the two races of *Psm*. Napoleon was found to be resistant to R2  
103 but susceptible to R1, and vice versa for Roundel (Garrett, 1978). It may therefore be challenging to  
104 breed resistance to all three of the genetically distinct *P. syringae* clades.

105

106 Various studies have established the mechanisms of host immunity in the model *P. syringae* patho-  
107 systems of *Solanum lycopersicum* (tomato), *Arabidopsis thaliana* (thale cress) and *Phaseolus*  
108 *vulgaris* (bean) (Preston, 2000; Quirino & Bent, 2003; Arnold *et al.*, 2011). *P. syringae* uses a  
109 range of virulence factors, including Type III secretion system effector proteins (T3Es) to suppress  
110 the plant immune system. Plant immunity can be broadly divided into two stages: PAMP-Triggered  
111 Immunity (PTI) and Effector-Triggered Immunity (ETI) (Jones & Dangl, 2006). PTI is a response  
112 towards conserved pathogen molecules and allows plants to exhibit non-host resistance to many  
113 potential pathogens. ETI occurs when host resistance proteins (R proteins) detect the presence of  
114 pathogen effectors and typically leads to a hypersensitive cell death response (HR), which prevents  
115 the spread of the pathogen (Senthil-Kumar & Mysore, 2013). ETI is associated with varietal  
116 resistance within a host species, whereby particular host cultivars have R genes that trigger the HR  
117 towards particular pathogen races. Studies have also found that ETI may play a role in non-host  
118 resistance (Gill *et al.*, 2015). Initial studies of ETI-associated host resistance were focused on  
119 qualitative resistance, whereby a single R gene provides complete resistance against a particular  
120 pathogen. Although the above generalisations about PTI and ETI are valid, it is well known that in  
121 the field varietal resistance is often quantitative; whereby resistance leads to reduction but not  
122 absence of the disease. This type of resistance is often controlled by more than one gene, with  
123 different host genotypes exhibiting a range of susceptibility levels to the pathogen (Poland *et al.*,

124 2009), and even towards single T3Es (Iakovidis *et al.*, 2016). Quantitative host resistance may  
125 encompass a combination of PTI and ETI (Corwin *et al.*, 2016). As no fully canker-resistant host  
126 genotypes have been identified, the genetic basis of host resistance to bacterial canker is likely to be  
127 quantitative. It may involve many different genes that additively contribute to more resistant  
128 phenotypes.

129

130 To analyse the genetics of pathogenicity and disease resistance to canker, the pathogenicity of a  
131 diverse range of *P. syringae* strains was studied. Experiments were conducted, using both lab-based  
132 and field inoculations, to characterise the interaction of the strains with both cherry and plum. This  
133 robust series of infection experiments provides a reliable pathogenicity framework for future  
134 genetic dissection of virulence and disease resistance.

135

136

## 137 **Materials and Methods**

138

### 139 **Bacterial strains**

140 Strains of *Pseudomonas syringae* (listed in Table 1) were grown on King's B agar at 25 °C. For  
141 liquid culture, strains were grown in Lysogeny Broth (LB) shaking at 25 °C, 150 rpm.

142

### 143 **Genome sequencing**

144 Nineteen *P. syringae* strains were genome sequenced using the Illumina MiSeq V3. DNA was  
145 extracted using the Puregene Yeast/Bact Kit (Qiagen). DNA libraries were prepared by fragmenting  
146 the DNA using a sonicating water bath for 30 seconds. DNA was then size-selected by gel  
147 electrophoresis to obtain fragments of 400-700 bp using the Zymogen gel extraction kit (Zymo  
148 Research). Libraries were created using the NextFlex Rapid-DNA sequencing kit. Barcodes were  
149 multiplexed to allow pooling of multiple samples. Libraries were quality checked using the  
150 Fragment Analyzer (Advanced Analytical) and Qubit (Life Technologies).

151

152 Libraries were sequenced using the Illumina Mi-Seq V3 (Illumina) 300 bp paired-end reads. Raw  
153 data for each genome was quality checked and trimmed using fastqc-mcf  
154 (<https://code.google.com/p/ea-utils/wiki/FastqMcf>). The reads were error corrected using Quake  
155 prior to assembly (Kelley *et al.*, 2010). Each genome was then assembled using SPAdes 3.7.0  
156 (Bankevich *et al.*, 2012) and summary statistics generated using Quast (Gurevich *et al.*, 2013).

157

### 158 **Phylogenetic analysis**

159 A phylogenetic tree was created for all sequenced strains and other strains which had genome  
160 sequences available on NCBI. The nucleotide sequences of seven house-keeping genes (*acnB*, *fruK*,  
161 *gapA*, *gltA*, *gyrB*, *pgi* and *rpoD*) were extracted from all genomes and individually aligned using  
162 Geneious 7.1.9. The alignments were concatenated and trimmed to produce an overall alignment of

163 9393bp. A Bayesian phylogeny was created of this alignment using the Geneious plug-in of  
164 MrBayes (Huelsenbeck & Ronquist, 2001). The GTR gamma model of evolution was used with a  
165 burn-in length of 100,000 and sub-sampling frequency of 200.

166

### 167 **Plant material**

168 All *Prunus* material was propagated at NIAB-EMR. For whole-tree inoculations, one-year old  
169 grafted trees were used. Cherry cultivars were grafted on the rootstock Gisela 5, whilst plum was  
170 grafted on St Julian A. For detached leaf assays, 1-2 week old, fully-expanded leaves were obtained  
171 from glasshouse grown trees. Immature green cherry fruits were obtained from mature trees.

172

### 173 **Pathogenicity assays**

174 Bacterial inoculum was prepared from overnight LB cultures. These were spun down (3500 g, 10  
175 minutes) and re-suspended in sterile 10 mM MgCl<sub>2</sub>. A spectrophotometer was used to measure  
176 concentration, with an optical density of 0.2 (OD<sub>600</sub>) being ~2x10<sup>8</sup> CFU/ml (Debener *et al.*, 1991).

177

### 178 **Whole-tree inoculations**

179 Whole-trees were inoculated through either wounds or leaf scars (Crosse & Garrett, 1966). Field  
180 inoculations were performed in October 2015 and glasshouse wound inoculations in February 2015.  
181 Bacterial suspensions of 2x10<sup>7</sup> CFU/ml were used for inoculations.

182

183 To inoculate through wounds, a sterile scalpel was used to cut a shallow wound into the trunk of the  
184 tree and 200µl of inoculum was pipetted into the wound. To inoculate leaf scars, the leaf was  
185 removed and 10µl of bacterial suspension was pipetted on the exposed scar. The inoculation sites  
186 were covered with parafilm and duct tape. Multiple inoculations were performed on the same tree,  
187 with at least 4 buds between inoculations. For the field experiment the trees were left for 6 months  
188 before assessment in May 2016, whereas the glasshouse experiment was assessed after 2 months.



189 To assess disease the bark was stripped back and length of necrosis was measured using a caliper  
190 (field experiment only). A disease score was determined as 1: no symptoms 2: limited browning, 3:  
191 necrosis and gumming and 4: necrosis, gumming and spreading from site of inoculation.

192

### 193 **Cut shoot inoculations**

194 A cut shoot assay was performed as in previous studies (Krzyszewska *et al.*, 1992; Santi *et al.*, 2004).  
195 Eight strains were inoculated onto four cherry and two plum cultivars. Bacterial inoculum was  
196 prepared at a concentration of  $2 \times 10^7$  CFU/ml. Dormant one-year shoots (5mm diameter) were cut  
197 into 10 cm sections. They were sterilised with 0.5% hypochlorite for five minutes, rinsed in tap  
198 water and left overnight to air-dry. Next, 5 mm from the shoot tip was cut and the shoot was dip  
199 inoculated for five minutes. The wound was covered with parafilm and the shoot bases were freshly  
200 cut (5 mm) and placed in transparent-boxes immersed in 20 mm deep distilled water. The shoots  
201 were incubated at 15 °C with 16-hour light, 8-hour dark cycle for one week. Next, shoots were  
202 transferred to -2 °C for one week to simulate frost damage. Finally, the basal 10 mm of each shoot  
203 was removed and they were placed in water-soaked Oasis Foam (Oasis Floral). These were  
204 incubated for a further 4 weeks at 15 °C. The trays were covered with cling-film to maintain a high  
205 humidity.

206

207 The shoots were assessed by peeling back the bark from the top 30 mm of the shoot. Digital images  
208 were captured and analysed with software (Li *et al.*, 2015) to determine the percentage area of  
209 necrosis.

210

### 211 **Cherry fruit inoculations**

212 To inoculate immature cherry fruits a stab-inoculation method was used (Moragrega & Llorente,  
213 2003). Fruits were sterilised in 0.5% hypochlorite for five minutes and rinsed in distilled water.  
214 Bacteria were then scraped from 5-day old plates using a 24g needle and stabbed into the plant

215 material. Fruits were placed in transparent boxes lined with moist tissue paper to maintain a high  
216 humidity. The fruits were kept at 22 °C (16hr light, 8hr dark) and visually assessed over time. Two  
217 independent assays on the different cultivars were performed.

218

### 219 **Leaf inoculations and microscopy**

220 Inoculum concentration varied from  $2 \times 10^6$  CFU/ml to  $2 \times 10^8$  CFU/ml. Freshly picked, 1-2 week old  
221 leaves were used for leaf inoculations. The leaves were infiltrated with bacterial suspension from  
222 the abaxial surface using a blunt-ended syringe. Leaves were then placed in plastic trays, which  
223 contained a 10 mm layer of water agar (10g/L), covered in damp paper towel. The tray was sealed  
224 inside a transparent bag and incubated at 22 °C (16hr light, 8hr dark). The leaves were left for a  
225 maximum of 10 days before assessment. At least three leaves were inoculated for each isolate, with  
226 the three replicate leaves coming from different plants.

227

228 Bacterial population growth within the leaves was measured over time. Day 0 populations were  
229 always calculated to check that the inoculum concentrations were similar between treatments. Leaf  
230 discs were excised using a sterile cork borer (0.5cm). Discs were then homogenised in 10 mM  
231  $MgCl_2$ . A dilution series was plated out to determine bacterial concentration (CFU/ml). Each  
232 concentration was plated out three times (pseudoreplicates). Overall, for each bacterial strain  
233 studied there were three replicate leaf inoculations and three pseudoreplicates to measure the  
234 concentration of each. Two independent experiments were performed for the leaf assays of a subset  
235 of strains inoculated on cherry and plum and the inoculations on different cherry cultivars.

236

237 Electron microscopy was performed by Dr Ian Brown (University of Kent) on infected cherry  
238 leaves. Detached leaves were infiltrated with bacteria at  $2 \times 10^6$  CFU/ml and incubated for one week  
239 at 22 °C.

240

241 Inoculated leaves were cut into 2 mm squares using a razor blade in a drop of cold fixative (2.5%  
242 glutaraldehyde in 100mM sodium cacodylate buffer pH 7.2 [CAB]) on dental wax and processed as  
243 previously described (Soylu *et al.*, 2005). Sections were viewed in a Jeol 1230 TEM with an  
244 accelerating voltage of 80kV and images recorded with a Gatan Multiscan 791 digital camera.

245

## 246 **Experimental design and statistical analysis**

247 To randomise the glasshouse whole-tree canker assay, an incomplete block-design was used. This  
248 allowed assessment of 22 different strains on 22 trees, with five replicates of each strain. In the field  
249 experiment, the virulence of eight strains was assessed on four cherry and two plum cultivars, using  
250 two different inoculation methods. To reduce the number of trees required, the eight different  
251 strains were divided across two trees, with each tree also having one negative control. This meant  
252 that two adjacently planted trees comprised one experimental unit of all strains and controls  
253 inoculated on the same cultivar using one inoculation method. A balanced incomplete design was  
254 used to randomise strain positions onto the two trees. A balanced complete design was then used to  
255 randomise the different cultivars and inoculation methods within 10 blocks in the field. Each block  
256 contained 24 trees (16 cherry and eight plum), and the total experiment involved 240 trees.

257

258 R software (R Core Team, 2012) was used for all statistical analyses as described in detail in  
259 supplementary methods. All ANOVA tables are also presented in the supplementary data.

260

## 261 **Results**

### 262 **Phylogenetics**

263 To determine the diversity of strains isolated from cherry and plum, the genomes of 18 *P. syringae*  
264 strains were sequenced. The strains included bacteria representative of all three previously  
265 designated clades, *Psm* R1, *Psm* R2 and *Pss*. *Pss* and *Psm* R1 included strains isolated from both  
266 cherry and plum, whilst the *Psm* R2 strains all originated from cherry. A previously undescribed

267 strain that did not belong to these clades (*Ps* 9643), which had been isolated from a plum leaf wash  
268 was also included. Finally, an additional strain (RMA1) isolated from the perennial species  
269 *Aquilegia vulgaris*, that preliminary analysis had shown to be closely related to *Psm* R2 was  
270 sequenced. The DNA sequences of seven MLST genes were then extracted from the genomes.  
271 Homologous sequences from 59 genome assemblies of additional strains within the *P. syringae*  
272 complex were then downloaded from NCBI. These included strains that were also isolated from  
273 *Prunus* and other plant species for comparison. A Bayesian phylogenetic tree was then generated  
274 based on a concatenated alignment of the seven genes.

275

276 The *P. syringae* phylogeny is presented in Figure 1, with strains isolated from *Prunus* highlighted.  
277 *Psm* R1, *Psm* R2 and *Pss* were found within phylogroups 3, 1 and 2 respectively. The two *Psm*  
278 races fell into discrete monophyletic clades, with individual strains being very closely related. By  
279 contrast, *Prunus Pss* isolates exhibited greater diversity. Strains isolated from cherry and plum did  
280 not form distinct host-specific clusters in any of the pathogenic clades, indicating that they are  
281 closely related and may cross-infect the two *Prunus* species. *Ps* 9643 was closely related to the  
282 *Prunus persicae* pathogen (*P.s* pv. *persicae*), whilst RMA1 was an out-group to the clade  
283 containing *Psm* R2 and the pathovars *P.s.* pv. *actinidiae*, *P.s.* pv. *avellanae* and *P.s.* pv. *theae*  
284 (which infect kiwifruit, hazelnut and tea respectively).

285

## 286 **Characterising pathogenicity of a range of *P. syringae* strains on cherry and plum trees**

287

288 **Whole-tree glasshouse experiment** To determine the fundamental ability of each strain to cause  
289 bacterial canker on cherry, a whole-tree wound inoculation experiment was performed. All strains  
290 isolated from cherry and plum, as well as related pathogens of other plants: *P.s* pv. *phaseolicola*  
291 1448A (*Pph*), *P.s* pv. *avellanae* BPIC631 (*Psav*) and RMA1, were included. Comparisons between  
292 strains were made based on the level of necrosis produced in the cambial layer underneath the bark

293 at the site of inoculation after two months of incubation. Strains exhibited a wide range of virulence  
294 profiles on cherry (Figure 2). Both the non-pathogens and negative control gave very limited  
295 browning and callusing associated with a wound response. Pathogenicity was indicated by black,  
296 necrotic lesions that sometimes spread from the inoculation site and were associated with gumming.  
297 There was clear variation between members of the different *Prunus*-infecting clades. Strains of *Psm*  
298 R1 and R2 showed variation in virulence, but rarely spread from the inoculation site. Meanwhile,  
299 most strains of *Pss* were able to spread. Within *Psm* R1, only two cherry strains (R1-5244 and R1-  
300 9646) caused gumming and necrosis, whilst R1-9657 showed reduced virulence, not significantly  
301 different to the plum R1 strains. Symptoms caused by strains of *Psm* R1 isolated from plum were  
302 not significantly different from those associated with the non-pathogens. Most strains of *Psm* R2  
303 were pathogenic, however R2-5260 showed reduced virulence. Apart from one strain, *Pss* was  
304 highly pathogenic, with symptoms typically spreading from the site of inoculation. The strain *Ps*  
305 9643 isolated from a plum leaf, but found not to be closely related to the other canker pathogens  
306 (Figure 1), behaved as a non-pathogen of cherry.

307

308 **Whole-tree field experiment** A set of strains with contrasting pathogenicity and host of isolation  
309 was chosen for pathogenicity screening under field conditions, using leaf scar and wound  
310 inoculations on cherry and plum cultivars. The strains included cherry pathogens (R1-5244, R2-  
311 leaf, *Pss* 9097 and *Pss* 9293) and non-pathogens (R1-5300, *Ps* 9643, *Pph* and RMA1). Concerning  
312 cherry, the cultivar Merton Glory is reported to be tolerant to canker (APS, 1966), Napoleon and  
313 Roundel show race-specific differences, with Napoleon being susceptible to *Psm* R1 and tolerant to  
314 R2 (and vice versa in Roundel) (Garrett, 1978). The cultivar Van is reported to be universally  
315 susceptible (Long & Olsen, 2013). For plum, Victoria is reported as susceptible and Marjorie's  
316 Seedling is more resistant (RHS, n.d.).

317

318 In cherry, data for both disease score (on an ordered categorical scale) and symptom length (mm)  
319 are presented in Figure 3. With both inoculation methods, the pathogens (R1-5244, R2-leaf, *Pss*-  
320 9097 and *Pss*-9293) caused necrosis and gumming (score  $\geq 3$ ), and in some cases lesions spread  
321 extensively beyond the inoculation site. In contrast to the glasshouse wound inoculations, all three  
322 pathogenic clades (*Psm* R1, *Psm* R2 and *Pss*) were able to spread from site of inoculation  
323 (previously only *Pss* appeared to spread). The non-pathogen inoculations generally induced limited  
324 browning (scores 1-2), with disease score profiles similar to the control. In the field, contamination  
325 by wild *Pseudomonads* may have occurred, and this explained why some control inoculations  
326 generated disease symptoms (6% of controls scored  $\geq 3$ ). For disease score, both inoculation  
327 methods were analysed together. The percentage of inoculations exhibiting disease symptoms  
328 (score  $\geq 3$ ) was greater in the wound inoculations than scar. Whilst, comparing cultivars, higher  
329 scores were more frequently observed in Napoleon than the other three cultivars.

330

331 Data for lesion length are also presented in Figure 3 (A2/B2). Due to differences in variance the two  
332 inoculation methods were analysed separately. REML analyses indicated there were significant  
333 differences between bacterial strains and host cultivars for both inoculation experiments. In both the  
334 length and score analyses there were no significant interactions between treatments, as pathogen  
335 and non-pathogen responses were consistent across the cultivars, with the two inoculation methods.  
336 There did appear to be variation in *Psm* R2 virulence between the cultivars, particularly after wound  
337 inoculation (Figure 3-B2), with reduced virulence compared to *Psm* R1 on Van, but a high level of  
338 virulence on Roundel. The plum strain *Psm* R1 5300 was not significantly different from the non-  
339 pathogens, indicating that it lacks pathogenicity for cherry. The two *Pss* strains varied considerably  
340 in virulence, with the cherry isolate *Pss* 9097 being associated with higher disease scores than the  
341 plum isolate *Pss* 9293. This is consistent with the results of the glasshouse inoculation, where *Pss*  
342 9293 showed a reduced ability to cause canker. The cultivar Merton Glory appeared to be more  
343 tolerant to canker, with the lowest overall mean symptom length. Pathogenic strains were able to

344 cause disease symptoms on this cultivar but the length of these symptoms were not significantly  
345 greater than non-pathogens. This indicated that the pathogens could cause disease, but not spread  
346 effectively from site of inoculation.

347

348 In plum (Figure 4), symptoms produced were similar to those on cherry, with necrosis and  
349 gumming being indicative of disease. For the disease score, only strains with confirmed  
350 pathogenicity were able to spread (score = 4), however in comparison to the cherry inoculations, the  
351 R1-5300 plum isolate was pathogenic. As in cherry, infections through scars produced reduced  
352 disease scores compared to wound inoculations. The lesion length analysis showed that the only  
353 strains that were ever significantly different from the control were *Pss* 9097 and *Psm* R1 5300.  
354 Although analysis revealed there was no significant difference between the two cultivars, the plum  
355 cultivar Marjorie's Seedling did not appear to be susceptible to leaf scar infection, as no strain  
356 caused a necrosis length significantly different from the control. The plum cultivar Victoria was  
357 slightly more susceptible, with all strains of *Pss* and *Psm* R1 causing some necrosis.

358

### 359 **Laboratory-based pathogenicity assays**

360 The whole-tree inoculations allowed the the virulence of different *P. syringae* strains to be  
361 determined and identified non-pathogenic isolates. To rapidly screen for differences in virulence  
362 these methods are slow and involve the destruction of whole trees. To undertake large-scale  
363 resistance screens of *Prunus* mapping populations or to perform molecular studies of pathogenicity  
364 these methods are intractable. Therefore, several laboratory-based assays were assessed for their  
365 ability to reflect infection of whole trees.

366

### 367 **Cut shoot inoculations**

368 Several studies have documented the use of detached shoots for screening for bacterial canker  
369 resistance (Krzyszowska *et al.*, 1992; Santi *et al.*, 2004; Li *et al.*, 2015). Using strains included in the

370 field assay, cherry and plum were screened with the cut shoot method. This involved using one-year  
371 old dormant shoots and inoculating a cut end by dipping in bacterial suspension. The extent to  
372 which necrosis spread down the shoot cambial tissue from this point could then be used to measure  
373 quantitative differences in bacterial virulence/host resistance.

374

375 Figure 5 presents the results on both cherry and plum shoots. Strains exhibited host specificity  
376 towards the two *Prunus* species and towards particular cultivars. Focusing on cherry, pathogenic  
377 strains within *Psm* R1-5244, *Psm* R2-5255 and *Pss* 9097 were able to cause necrosis on >5% of the  
378 shoot area. The two *Psm* races varied in virulence on the different cultivars. As in the field  
379 experiment, *Psm* R2 was more virulent on Roundel, but less virulent on Van compared to *Psm* R1.  
380 The cut shoot test also confirmed that Merton Glory showed some tolerance compared to the other  
381 cultivars. On plum, the level of necrosis on Victoria was greater than that on Marjorie's Seedling.  
382 As observed in the field experiment, the plum strain of *Psm* R1 (R1-5300), was able to cause  
383 necrosis where it had failed on cherry. On cv. Victoria the *Aquilegia* pathogen RMA1 caused  
384 necrosis similar to *Pss* 9097.

385

386

### 387 **Inoculation of detached immature cherry fruits**

388 The suitability of immature cherry fruits was assessed for screening for bacterial canker resistance.  
389 Following stab inoculation, symptoms developed within a few days. Examples of the different  
390 clades that infect *Prunus* produced remarkably different symptoms on this tissue. Strains of *Pss*  
391 produced large necrotic lesions on cherry fruits within 2 days, and these expanded over time. By  
392 contrast, both *Psm* races produced water-soaked lesions within 2 days, and these did not increase in  
393 size. Most of the non-pathogens caused limited browning. Qualitative symptom assessment  
394 therefore allowed differentiation between pathogens and non-pathogens (Figures S1-S4).  
395 Measurements of lesion diameter caused by all *P. syringae* strains (Figure 6), confirmed significant  
396 differences between strains. However, diameters of the *Psm*-induced water-soaked lesions were not



397 greater than non-pathogens symptoms. The strain *Ps* 9643, although non-pathogenic on trees,  
398 caused a similar level of water-soaking to the pathogenic *Psm* races (Figure S4), indicating a failure  
399 of fruit to mount a resistant reaction towards this strain.

400

401 The three pathogenic clades were then used to screen different cherry cultivars. The results for  
402 lesion diameter are presented in Figure S5. Lesions caused by *Pss* were smaller on Merton Glory  
403 and Napoleon than on Van. However, no differences in lesion size or appearance between the two  
404 *Psm* races on different host cultivars were found, in contrast to experiments on woody tissues.

405

#### 406 **Inoculation of detached leaves**

407 A pilot experiment determined the best method of leaf inoculation was by blunt syringe-infiltration  
408 (Figure S6). Bacterial multiplication was initially recorded following inoculation with a low  
409 concentration of bacteria ( $2 \times 10^6$  per ml). On cherry, the pathogens (R1-5244, R2-leaf and *Pss*-  
410 9097) exceeded levels of  $10^6$  CFU/ml within four days (Figure 7) and caused black necrosis at the  
411 site of infection. The non-pathogens, including the plum isolate R1-5300 failed to reach  $10^6$   
412 CFU/ml even after 10 days *in planta* and did not produce symptoms. These results support those  
413 found on whole-trees, with only those strains capable of causing bacterial canker being able to  
414 reach high levels within leaves. On plum, the pathogens also exceeded  $10^6$  CFU/ml after 4 days.  
415 However, some of the strains that were non-pathogenic on cherry were able to grow to similar  
416 levels as the pathogens. The *Psm* R1 plum isolate R1-5300 and RMA1 isolated from *Aquilegia*  
417 *vulgaris* were found to be capable of multiplication. In the case of R1-5300 this result supports  
418 results from inoculation of woody tissues indicating that it is a pathogen of plum but not cherry.  
419 The ability of RMA1 to multiply within plum leaves did not support the field experiment where it  
420 caused similar symptoms to the negative control.

421

422 Next, the population growth of all strains used in this study was tested. An end-point bacterial  
423 population count was taken after 10 days. Statistical analysis grouped the pathogens and non-  
424 pathogens into separate groups, validating population measurements as a method to differentiate  
425 pathogenic and non-pathogen strains (Figure S7).

426

427 The induction of the HR was also tested. To determine the best concentration to detect a HR,  
428 symptom development was scored at different concentrations (Figure S8). Scores were 0: no lesion,  
429 1: limited browning, 2: browning <50% of inoculated area, 3: browning >50% of inoculated area, 4:  
430 complete browning, 5: browning and spread from inoculation site. Area Under the Disease  
431 Progression Curve (AUDPC) values were calculated to make comparisons based on timing of  
432 symptoms. The strains varied in their ability to cause lesions at the different concentrations,  
433 particularly the non-pathogen RMA1 which failed to induce more than limited browning (score 2),  
434 except when inoculated at the highest concentration. The *Pss* strain induced rapid lesion formation  
435 within 24 hours and on rare occasions spread slightly from the site of inoculation. At the higher  
436 concentrations the final lesions of all strains were similar in appearance, but could be differentiated  
437 by symptom timing. The timing of lesion onset was found to clearly differentiate the pathogenic  
438 *Psm* races from other strains. The non-pathogens (including the plum *Psm* R1-5300) and pathogenic  
439 strain *Pss* 9097 all induced rapid lesion formation at the highest concentration, with complete  
440 browning of the inoculation site (score 4) within the first 48 hours, which was suggestive of a HR.  
441 Pathogenic *Psm* R1 and R2 induced slower symptom development. This was indicative of a hemi-  
442 biotrophic interaction with the host. To study this interaction in more detail *Psm* R2 was inoculated  
443 onto detached leaves and electron microscopy used to examine bacteria-plant cell interactions. The  
444 bacteria were found to multiply initially in the apoplastic space without causing plant cell death,  
445 confirming hemi-biotrophic development, although some wall alterations were noted next to  
446 colonies. (Figure S9A -C).

447

448 To compare the host reactions on cherry and plum, the leaf population count and symptom scoring  
449 experiments were extended with a group of representative strains (Figure 8). As before, population  
450 counts clearly differentiated pathogens and non-pathogens (Figure 8A). On both hosts, pathogens  
451 exceeded  $10^7$  CFU/ml and produced necrotic lesions. In comparison, non-pathogens failed to induce  
452 symptoms and did not reach  $10^7$  CFU/ml. In the symptom scoring experiment (Figure 8B) all  
453 strains gave symptoms in the leaves, however the timing of symptoms was used to differentiate  
454 pathogenicity and hypersensitivity. On cherry, both *Pss* pathogens and the non-pathogens *Ps* 9643,  
455 R1-5300 and RMA1 induced symptoms rapidly, R2-leaf, *Pph* and *Psav* were slightly slower and  
456 R1-5244 only induced symptoms 48-72 hpi. In plum, the two *Pss* strains and *Ps* 9643 rapidly  
457 induced symptoms. Other non-pathogens were slower and not significantly faster than R2-leaf.  
458 Symptom development of plum *Psm* R1 5300 was not significantly different from cherry R1-5244,  
459 both inducing symptoms 48 hpi, indicating that in plum the two pathogens behave similarly.  
460 Representative images of symptoms on cherry and plum leaves over time are presented in Figure  
461 S10.

462

### 463 **Suitability of leaves for resistance screening**

464 The leaf population assay clearly differentiated pathogens from non-pathogens. However, a screen  
465 for canker resistance would involve discriminating subtle differences in pathogen growth on  
466 different cherry genotypes. To see if detached leaves could discriminate cultivar differences, the  
467 assay was tested on four cultivars with differences in susceptibility recorded on woody tissue in the  
468 field. Strains representing the three cherry-infecting pathovars were tested. The three strains were  
469 able to grow to exceed  $10^6$  CFU/ml (Figure 9) and cause disease symptoms in all cultivars. This  
470 suggested that on leaves, any host-resistance to the pathogens could not be easily discriminated.  
471 The leaf system, although useful for comparing strains with divergent virulence levels may not be  
472 sensitive enough to detect the subtle differences between races of the pathogens found in the field.

473

## 474 **Discussion**

475 In this study, the genomes of a set of *P. syringae* isolates from different hosts were sequenced. The  
476 ability of these strains to cause canker disease on cherry and plum was characterised. Breeding for  
477 resistance towards this complex disease is particularly challenging due to the large number of  
478 divergent strains that appear to be pathogenic. Host resistance to cherry canker is likely to be multi-  
479 factorial and potential mechanisms of resistance towards the different cherry-infecting clades may  
480 operate at different stages of the disease cycle. Phylogenetic analysis confirmed that the three major  
481 canker-causing clades (*Psm* R1, *Psm* R2 and *Pss*) fall in separate phylogroups, and therefore  
482 pathogenicity towards cherry has arisen multiple times in the *P. syringae* species complex. As the  
483 different clades have convergently evolved, it is likely that host resistance mechanisms targeted  
484 towards them differ significantly.

485

486 First, the ability of individual bacterial strains to cause cherry canker was assessed using a  
487 glasshouse whole-tree inoculation. This provided a baseline to compare with the results of  
488 laboratory-based assays, that may or may not correlate with ability to cause canker. Although  
489 strains of *Psm* R1 were phylogenetically indistinct, they could be divided into pathogenic and non-  
490 pathogenic isolates, with non-pathogenic isolates failing to cause gumming and black necrosis.  
491 Non-pathogenic strains isolated from distantly related plant species were unable to cause disease,  
492 supporting the theory that individual pathovars are mostly specialised to their particular host plant  
493 (Sarkar *et al.*, 2006). All *Psm* R1 isolates from plum were non-pathogenic on cherry. Their lack of  
494 cherry pathogenicity may be due to host-specific factors. By contrast, all isolates of *Pss* (from plum  
495 and cherry) caused disease on cherry, indicating that these strains exhibit a greater host range.

496

497 Strains with variable virulence levels were then pathogenicity tested under field conditions, in  
498 assays which should be representative of natural disease. The different host-specificities of *Psm* R1  
499 strains on cherry and plum were confirmed. The cherry isolate *Psm* R1 5244 was pathogenic to both

500 cherry and plum, whereas *Psm* R1 5300 was only pathogenic on plum trees. This is an interesting  
501 result as phylogenetics revealed this clade to be highly homogeneous (Figure 1). As the  
502 phylogenetic analysis was based only on core house-keeping genes in the core genome, it may be  
503 missing divergence in the flexible genome that are responsible for differences in pathogenicity.  
504 Genomic analysis of these strains could reveal important differences in virulence factor repertoires  
505 that dictate host specificity. Interestingly, the results support studies done at East Malling looking at  
506 *Psm* R1 host specificity (Crosse & Garrett 1970). *Psm* R1 was originally designated as a race based  
507 on differences with *Psm* R2, however it is now known that these are two divergent clades, so should  
508 not really be designated as races of the same pathovar. However, the differences in pathogenicity of  
509 members of *Psm* R1 may indicate that, at least within the bacterial populations occupying orchards  
510 in UK, there may be a race structure within this clade, with the different groups varying in ability to  
511 infect different *Prunus* species. Members of the group containing *Psm* R1-5300 may be restricted in  
512 growth on cherry due to the expression of avirulence factors. Further sampling of a diverse range of  
513 strains from different *Prunus* species and cultivars should confirm this hypothesis.

514

515 The field inoculations were assessed using both disease score and symptom length. For disease  
516 score, cherry leaf scars appeared much less susceptible to infection. The leaf scar may act as a  
517 barrier to infection and reduce bacterial concentrations as the bacterial population is bottle-necked.  
518 Therefore, a higher percentage of trees scored highly for wound inoculations as this by-passed the  
519 barrier to infection. For symptom lengths, results were more variable, with most pathogen  
520 inoculations only spreading slightly. Only in rare cases did they cause severe necrosis, sometimes  
521 exceeding 100mm. The results revealed significant differences between cherry cultivars. In both  
522 wound and leaf scar inoculations, the cultivar Merton Glory exhibited a broad level of tolerance to  
523 all three pathogenic clades. This cultivar is therefore a candidate for further study of the  
524 mechanisms underlying resistance. Although the analysis did not show a strain by cultivar  
525 interaction, there was variation in resistance to *Psm* R2. This strain was associated with only limited

526 disease on Van, whilst the cultivar Roundel was highly susceptible. Van is therefore a candidate  
527 cultivar exhibiting race-specific resistance. There was no significant difference in symptom length  
528 or disease score of pathogenic *Psm* R1 and R2 on Napoleon, contrasting to previous studies that  
529 suggested Napoleon to be resistant to R2 (Garrett, 1978). In addition, previous studies reported *Pss*  
530 and *Psm* R2 to be less invasive through leaf scars inoculations than *Psm* R1 ( Crosse & Garrett  
531 1966; Freigoun & Crosse 1975), which contrasts to this study where all clades caused disease.  
532 Differences in experimental procedure could have led to variation in results. The original studies  
533 used fully mature trees which may exhibit contrasting resistance mechanisms to the young trees  
534 used in this study (Freigoun & Crosse 1975; Garrett 1978).

535

536 The field experiment on plum demonstrated significant differences between strains, but not between  
537 cultivars. The cultivar Marjorie's Seedling was not susceptible to any strains inoculated through  
538 leaf scars indicating this is unlikely to be a natural entry point for pathogens. Indeed, previous  
539 reports suggest that plum pathogens do not naturally enter through the leaf scars (Crosse, 1966).  
540 However, some pathogenic strains were found to be capable of causing disease on the cultivar  
541 Victoria when inoculated through leaf scars.

542

543 Several rapid laboratory-based assays were tested for their suitability for resistance screening.  
544 Assuming that the field wound inoculations represent the natural disease, the results of the other  
545 tests for a set of strains on cherry cv. Van were correlated against the wound results (Figure 10).  
546 The leaf scar, cut shoot and leaf population assays all correlated well with the wound results ( $r >$   
547  $0.70$ ), whilst the fruit assay did not correlate well ( $r = 0.37$ ).

548

549 Both inoculations of woody tissues (leaf scar and cut shoots) correlated well with the wound results.  
550 The cut shoot assay provided a rapid assessment that could differentiate pathogens and non-  
551 pathogens. It was also sensitive enough to detect variation in pathogen virulence on the different

552 cultivars. For example, *Psm* R2 caused the greatest necrosis on cv. Roundel in all three woody  
553 tissue inoculation tests, indicating that this cultivar is highly susceptible to *Psm* R2. In addition,  
554 differential virulence of *Psm* R1 and *Psm* R2 on cv. Van was supported by both the cut shoot and  
555 field experiments, suggesting this cultivar may possess some resistance to *Psm* R2. Various studies  
556 have utilised cut shoot inoculations of *P. syringae* and fungal canker-causing pathogens.  
557 Differences in virulence of the same isolate between field and laboratory results are sometimes  
558 reported (Farhadfar *et al.*, 2016; Gomez-Cortecero *et al.*, 2016). Therefore, a combination of whole  
559 tree and shoot tests could provide the most robust method of assessment. The cut shoot assay  
560 provided a means to perform rapid high-throughput screening, with speed aided through automated  
561 image analysis of shoots (Li *et al.*, 2015). Therefore, the results of such tests may help narrow down  
562 a list of putatively resistant genotypes, before resistance testing on whole trees.

563

564 The lack of correlation of the cherry fruit test with the field experiment indicated that the lesion  
565 development on fruit induced by a *P. syringae* strain may not reflect its pathogenicity in the field.  
566 Nevertheless, the qualitative symptoms this assay provides are useful to rapidly differentiate the  
567 different pathogenic clades. The induction of symptoms by strains non-pathogenic in the field (e.g.  
568 *Ps* 9643, Figure S4), indicated that results must be considered with caution. In comparison, the leaf  
569 population assay correlated well with wound inoculations and allowed discrimination of pathogens  
570 and non-pathogens. However, when the three pathogenic clades were inoculated across cherry  
571 cultivars (Figure 9) they all exceeded  $10^6$  CFU/ml *in planta* and caused symptom development. The  
572 presence of similar symptoms on both susceptible and tolerant varieties means that this method  
573 would not be very applicable for large-scale screening. The leaf and fruit assays were therefore not  
574 sensitive enough to determine subtle differences in cultivar susceptibility seen in the field  
575 experiment such as the resistance of cherry cv. Van to *Psm* R2. The quantitative differences in  
576 resistance of the different cherry cultivars in the field and shoot experiments may be tissue-specific,

577 and therefore resistance phenotypes in fruit and leaves may differ substantially from those found in  
578 dormant woody tissues.

579

580 Detached leaves provided a rapid means to assess pathogenicity through the measurement of  
581 bacterial population counts over time. Cherry leaf population counts clearly discriminated  
582 pathogenic and non-pathogenic strains. When inoculated at a low concentration only pathogenic  
583 strains (R1-5244, R1-leaf and *Pss* 9097) were able to cause disease lesions on cherry, which  
584 appeared 7-10 dpi. On Plum, the non-pathogen RMA1 and plum isolate R1-5300 were able to grow  
585 to similar levels to the cherry pathogens (Figure 7). The fact that RMA1 was able to grow to high  
586 levels in plum leaves does not correspond to its pathogenicity in the field assay. Interestingly, in the  
587 cutshoot assay (Figure 5) RMA1 caused necrosis on plum similar to the *Pss* pathogen. The field  
588 experiment showed that RMA1 is not a true pathogen of plum, however, its virulence in the lab-  
589 based assays may indicate it has adaptive potential to cause disease when inoculated in unnaturally  
590 high concentrations directly onto plant tissue. Its inability to cause any disease on cherry in all lab-  
591 based assays indicated that cherry may exhibit a robust non-host immune response towards this  
592 non-pathogen, which is different to that expressed in plum.

593

594 Symptom development on cherry leaves allowed differentiation of hypersensitive and pathogenic  
595 responses. When inoculated at high concentrations all strains produced necrotic lesions, however  
596 non-pathogens were found to induce symptoms earlier than pathogens of *Psm* R1 and R2. The  
597 activation of the HR may mean that ETI is operating against non-pathogens in cherry leaves, and  
598 differences in effector repertoires between cherry-infecting strains and non-pathogens could reveal  
599 those effectors that are detected. In particular, there were clear differences in pathogenicity of the  
600 two *Psm* R1 strains on cherry, which agreed with the whole-tree assay. The HR on cherry was clear  
601 for non-pathogens *Psm* R1 5300, *Ps* 9643 and RMA1, whereas symptom development associated  
602 with *Pph* and *Psav* was slower. This slower onset of symptoms may mean that any hypersensitive



603 response induced by these strains is weaker or that more basal resistance mechanisms such as  
604 PAMP-triggered immune responses play a greater role in preventing their population growth in  
605 leaves. Interestingly, although *Pss* strains reached high population levels in the leaves, they  
606 triggered symptom development at a similar rate to the HR caused by non-pathogens. *P. syringae* is  
607 traditionally described as a hemi-biotrophic pathogen (Lindeberg *et al.*, 2012), with delayed  
608 symptom onset during the biotrophic phase followed by symptoms during a necrotrophic phase.  
609 The results indicated that on leaves *Pss* may be more necrotrophic as it triggers symptoms rapidly.  
610 Further study could reveal the factors inducing these rapid symptoms. The production of non-  
611 ribosomal peptide toxins is common in strains of phylogroup 2, which includes *Pss* (Dudnik &  
612 Dudler, 2014), and if expressed early could cause the necrotic symptoms seen. Indeed, a study of  
613 *Pss* toxins (Yin-Yuan & Gross, 1991) showed that syringomycin is expressed within the first 24  
614 hours of inoculation of immature cherry fruits. *Pss* could also be deliberately triggering the HR like  
615 other necrotrophic pathogens to aid disease development (Govrin & Levine, 2000). Further study of  
616 the immune responses occurring within plant cells would be required to test these hypotheses.

617

618 The failure of designated non-pathogenic strains to produce symptoms in woody tissues was  
619 reflected by their low multiplication and induction of a HR-like response in leaves. Such clear cut  
620 resistance is characteristic of *avr/R* gene interactions reflecting ETI. By contrast, where differential  
621 reactions were observed between cultivars challenged with pathogenic *Psm* and *Pss*, quantitative  
622 differences in symptoms were seen. The lack of clear differentials between cultivars suggests that  
623 variation in susceptibility is not based simply on *avr/R* gene recognition. In field conditions, this  
624 plant-pathogen interaction lasts for many months. Perhaps, factors important not just for  
625 pathogenicity, but for the ability of bacterial populations to successfully colonise and persist  
626 through the season, dictate the outcome of this interaction. Resistance mechanisms that reduce  
627 persistence in woody tissue, e.g. responses that block bacteria spreading to new tissues and  
628 acquiring nutrients, may prevent a pathogenic strain from causing severe disease.

629

630 This study has focused on the detailed analysis of pathogenicity in strains used for genome  
631 sequencing. Results show that representatives of the three clades of *P. syringae* that cause bacterial  
632 canker may utilise distinct mechanisms of virulence and trigger differing host resistance  
633 mechanisms in cherry. A HR is putatively triggered in leaves, indicating that effector-triggered  
634 immunity may be operating in cherry against pathogens of other hosts. Cherry leaves and fruit  
635 failed to sufficiently reveal varietal differences to the same extent as experiments on woody tissues.  
636 This suggests that some resistance mechanisms are tissue-specific. A whole range of complex  
637 variable traits could be involved in these varietal differences in susceptibility. These include timing  
638 of leaf drop, phellogen activity and differences in leaf-surface bacterial populations which act as  
639 inocula for wood infections, as discussed by Crosse (1966). Breeding resistance to at least three  
640 rather distinct groups of a pathogen remains a challenging prospect. Cultivars such as Merton Glory  
641 that exhibit resistance to all three clades may be useful for determining the genetic basis of broad-  
642 spectrum resistance mechanisms, independent of ETI.

643

#### 644 **Acknowledgments**

645 We thank Steve Roberts, Helen Neale and David Guttman for providing bacterial strains used in  
646 this study. Electron microscopy was performed by Dr Ian Brown (University of Kent). We also  
647 thank Karen Russell and Connie Garrett for valuable advice about the pathogenicity test  
648 development, as well as the East Malling Farm and Glass team for assistance in tree grafting and  
649 planting. The authors declare no conflict of interest.

650

651

#### 652 **References**

653 APS, 1966. Merton cherries from England. *Journal of Fruit Varieties and Horticultural Digest*, **20**.

- 654 Arnold DL, Lovell HC, Jackson RW, Mansfield JW, 2011. Pathogen profile *Pseudomonas syringae*  
655 pv . *phaseolicola*: From “ has bean ” to supermodel. *Molecular Plant Pathology* **12**, 617–  
656 627.
- 657 Bankevich A, Nurk S, Antipov D *et al.*, 2012. SPAdes: A new genome assembly algorithm and its  
658 applications to single-cell sequencing. *Journal of computational biology* □: *A journal of*  
659 *computational molecular cell biology* **19**, 455–77.
- 660 Berge O, Monteil CL, Bartoli C *et al.*, 2014. A user’s guide to a data base of the diversity of  
661 *Pseudomonas syringae* and its application to classifying strains in this phylogenetic  
662 complex. *PLoS ONE* **9**, e105547.
- 663 Bultreys A & Kaluzna M, 2010. Bacterial cankers caused by *Pseudomonas syringae* on stone fruit  
664 species with special emphasis on the pathovars *syringae* and *morsprunorum* Race 1 and  
665 Race 2. *Journal of Plant Pathology* **92**, S1.21-S1.33.
- 666 Corwin JA, Copeland D, Feusier J *et al.*, 2016. The quantitative basis of the *Arabidopsis* innate  
667 immune system to endemic pathogens depends on pathogen genetics. *PLoS Genetics* **12**, 1–  
668 29.
- 669 Crosse JE, 1959. Bacterial canker of stone-fruits. IV. Investigation of a method for measuring the  
670 inoculum potential of cherry trees. *Annals of Applied Biology* **47**, 306–317.
- 671 Crosse JE, 1966. Epidemiological relations of the *Pseudomonad* pathogens of deciduous fruit trees.  
672 *Annual review of phytopathology* **4**, 291–310.
- 673 Crosse, JE, & Garrett CME, 1966. Bacterial canker of stone-fruits. VII. Infection experiments with  
674 *Pseudomonas morsprunorum* and *Ps. syringae*. *Annals of Applied Biology* **58**, 31–41.
- 675 Crosse, JE, & Garrett CME, 1970. Pathogenicity of *Pseudomonas morsprunorum* in relation to host  
676 specificity. *Journal of General Microbiology* **62**, 315–327.
- 677 Debener T, Lehnackers H, Arnold M, Dangl JL, 1991. Identification and molecular mapping of a  
678 single *Arabidopsis thaliana* locus determining resistance to a phytopathogenic *Pseudomonas*  
679 *syringae* isolate. *The Plant journal* □: *for cell and molecular biology* **1**, 289–302.

- 680 Dudnik A, Dudler R, 2014. Genomics-based exploration of virulence determinants and host-specific  
681 adaptations of *Pseudomonas syringae* strains isolated from grasses. *Pathogens* **3**, 121–148.
- 682 Farhadfar S, Keshavarzi M, Bouzari N, Moghadam L, Soleimani A, 2016. Susceptibility of cherries  
683 to bacterial canker ( *Pseudomonas syringae* pv . *syringae* ) in field and laboratory.  
684 *International journal of Agriculture and Forestry* **6**, 20–27.
- 685 Freigoun SO, & Crosse JE, 1975. Host relations and distribution of a physiological and pathological  
686 variant of *Pseudomonas morsprunorum*. *Annals of Applied Biology* **81**, 317–330.
- 687 Gardan L, Shafik H, Belouin S, Broch R, Grimont F, Grimont P, 1999. DNA relatedness among the  
688 pathovars of *Pseudomonas syringae* and description of *Pseudomonas tremae* sp. nov. and  
689 *Pseudomonas cannabina* sp. nov. (ex Sutic and Dowson 1959). *International Journal of*  
690 *Systematic Bacteriology* **49**, 469–478.
- 691 Garrett CME, 1978. Pathogenic races of *Pseudomonas morsprunorum*. In: *Proceedings of the IVth*  
692 *International Conference on Plant pathogenic Bacteria Vol II*. 889–890.
- 693 Garrett CME, 1979. Screening *Prunus* rootstocks for resistance to bacterial canker, caused by  
694 *Pseudomonas morsprunorum*. *Journal of Horticultural Science* **54**, 189–193.
- 695 Gilbert V, Legros F, Maraite H, Bultreys A, 2008. Genetic analyses of *Pseudomonas syringae*  
696 isolates from Belgian fruit orchards reveal genetic variability and isolate-host relationships  
697 within the pathovar *syringae*, and help identify both races of the pathovar *morsprunorum*.  
698 *European Journal of Plant Pathology* **124**, 199–218.
- 699 Gilbert V, Planchon V, Legros F, Maraite H, Bultreys A, 2009. Pathogenicity and aggressiveness in  
700 populations of *Pseudomonas syringae* from Belgian fruit orchards. *European Journal of*  
701 *Plant Pathology* **126**, 263–277.
- 702 Gill US, Lee S, Mysore KS, 2015. Host versus nonhost resistance: Distinct wars with similar  
703 arsenals. *Phytopathology* **105**, 580–587.

- 704 Gomez-Cortecero A, Saville RJ, Scheper RWA *et al.*, 2016. Variation in host and pathogen in the  
705 *Neonectria/Malus* interaction; towards an understanding of the genetic basis of resistance to  
706 European canker. *Frontiers in Plant Science* **7**, 1365.
- 707 Govrin EM, Levine A, 2000. The hypersensitive response facilitates plant infection by the  
708 necrotrophic pathogen *Botrytis cinerea*. *Current Biology* **10**, 751–757.
- 709 Gurevich A, Saveliev V, Vyahhi N, Tesler G, 2013. QUAST: quality assessment tool for genome  
710 assemblies. *Bioinformatics* **29**, 1072–1075.
- 711 Huelsenbeck JP, Ronquist F, 2001. MRBAYES: Bayesian inference of phylogeny. *Bioinformatics*  
712 **17**, 1572–1574.
- 713 Iakovidis M, Teixeira PJPL, Exposito-Alonso M *et al.*, 2016. Effector triggered immune response in  
714 *Arabidopsis thaliana* is a quantitative trait. *Genetics* **204**, 337–353.
- 715 Joardar V, Lindeberg M, Jackson RW *et al.*, 2005. Whole-genome sequence analysis of  
716 *Pseudomonas syringae* pv. *phaseolicola* 1448A reveals divergence among pathovars in  
717 genes involved in virulence and transposition. *Journal of Bacteriology* **187**, 6488–6498.
- 718 Jones JDG, Dangl JL, 2006. The plant immune system. *Nature* **444**, 323–329.
- 719 Kaluzna M, Ferrante P, Sobiczewski P, Scortichini M, 2010. Characterization and genetic diversity  
720 of *Pseudomonas syringae* from stone fruits and hazelnut using repetitive-PCR and MLST.  
721 *Journal of Plant Pathology* **92**, 781–787.
- 722 Kelley DR, Schatz MC, Salzberg SL, 2010. Quake: Quality-aware detection and correction of  
723 sequencing errors. *Genome Biology* **11**, R116.
- 724 Krzesinska EZ, Nina A, Azarenko M, 1992. Excised twig assay to evaluate cherry rootstocks for  
725 tolerance to *Pseudomonas syringae* pv. *syringae*. *HortScience* **27**, 153–155.
- 726 Li B, Hulin MT, Brain P, Mansfield JW, Jackson RW, Harrison RJ, 2015. Rapid, automated  
727 detection of stem canker symptoms in woody perennials using artificial neural network  
728 analysis. *Plant Methods* **11**, 57.

- 729 Lindeberg M, Cunnac S, Collmer A, 2012. *Pseudomonas syringae* type III effector repertoires: Last  
730 words in endless arguments. *Trends in Microbiology* **20**, 199–208.
- 731 Long J, Olsen L, 2013. *Sweet cherry cultivars for brining, freezing, and canning in Oregon*.  
732 Available at: <https://catalog.extension.oregonstate.edu/files/pr>.
- 733 Ménard M, Sutra L, Luisetti J, Prunier JP, Gardan L, 2003. *Pseudomonas syringae* pv. *avii* (pv.  
734 nov.), the causal agent of bacterial canker of wild cherries (*Prunus avium*) in France.  
735 *European Journal of Plant Pathology* **109**, 565–576.
- 736 Moragrega C, Llorente I, 2003. Susceptibility of European pear cultivars to *Pseudomonas syringae*  
737 pv. *syringae* using immature fruit and detached leaf assays. *European Journal of Plant*  
738 *Pathology* **109**, 319–326.
- 739 Parkinson N, Bryant R, Bew J, Elphinstone J, 2011. Rapid phylogenetic identification of members  
740 of the *Pseudomonas syringae* species complex using the *rpoD* locus. *Plant Pathology* **60**,  
741 338–344.
- 742 Poland JA, Balint-Kurti PJ, Wisser RJ, Pratt RC, Nelson RJ, 2009. Shades of gray: The world of  
743 quantitative disease resistance. *Trends in Plant Science* **14**, 21–29.
- 744 Preston GM, 2000. *Pseudomonas syringae* pv. *tomato*: The right pathogen, of the right plant, at the  
745 right time. *Molecular Plant Pathology* **1**, 263–275.
- 746 Quirino BF, Bent AF, 2003. Deciphering host resistance and pathogen virulence: The  
747 *Arabidopsis/Pseudomonas* interaction as a model. *Molecular Plant Pathology* **4**, 517–530.
- 748 R Core Team, 2012. *R: A language and environment for statistical computing*. Vienna, Austria: R  
749 Foundation for Statistical Computing.
- 750 RHS, *Bacterial canker*. Available at: <https://www.rhs.org.uk/advice/profile?PID=86>.
- 751 Santi F, Russell K, Menard M, Dufour J, 2004. Screening wild cherry (*Prunus avium*) for resistance  
752 to bacterial canker by laboratory and field tests. *Forest Pathology* **34**, 349–362.
- 753 Sarkar SF, Gordon JS, Martin GB, Guttman DS, 2006. Comparative genomics of host-specific  
754 virulence in *Pseudomonas syringae*. *Genetics* **174**, 1041–1056.

- 755 Senthil-Kumar M, Mysore KS, 2013. Nonhost resistance against bacterial pathogens: retrospectives  
756 and prospects. *Annual review of phytopathology* **51**, 407–427.
- 757 Soylu S, Brown I, Mansfield J, 2005. Cellular reactions in *Arabidopsis* following challenge by  
758 strains of *Pseudomonas syringae*: From basal resistance to compatibility. *Physiological and*  
759 *Molecular Plant Pathology* **66**, 232–243.
- 760 Spotts RA, Wallis KM, Serdani M, Azarenko AN, 2010. Bacterial canker of sweet cherry in  
761 Oregon—Infection of horticultural and natural wounds, and resistance of cultivar and  
762 rootstock combinations. *Plant Disease* **94**, 345–350.
- 763 Stone A, Baker B, 2010. Organic management of late blight of potato and tomato with copper  
764 products. Available at: [http://articles.extension.org/pages/18351/organic-management-of-](http://articles.extension.org/pages/18351/organic-management-of-late-blight-of-potato-and-tomato-with-copper-products)  
765 [late-blight-of-potato-and-tomato-with-copper-products](http://articles.extension.org/pages/18351/organic-management-of-late-blight-of-potato-and-tomato-with-copper-products)
- 766 Vicente JG, Roberts SJ, 2003. Screening wild cherry micropropagated plantlets for resistance to  
767 bacterial canker. In: Santa Lacobellis N, Collmer A, Hutcheson S, *et al.*, eds. *Pseudomonas*  
768 *syringae and related pathogens*. Springer Netherlands, 1–8.
- 769 Vicente JG, Roberts SJ, 2007. Discrimination of *Pseudomonas syringae* isolates from sweet and  
770 wild cherry using rep-PCR. *European Journal of Plant Pathology* **117**, 383–392.
- 771 Yin-Yuan M, Gross D, 1991. Expression *in vitro* and during plant pathogenesis of the *syrB* gene  
772 required for syringomycin production by *Pseudomonas syringae* pv. *syringae*. *Molecular*  
773 *plant-microbe interactions* □: *MPMI* **4**, 28–36.

774

775

776

## 777 **Table Legends**

778

### 779 **Table 1**

780 Bacterial strains used in this study with host of isolation and reference/source. Strains sequenced in  
781 this study are listed first, followed by the out-group strains *Pph* and *Psav* included in pathogenicity

782 tests and then the rest of the strains used solely for phylogenetic analysis. The Genbank accessions  
783 of genomes used for the phylogenetic analysis are included. Full genbank accessions of strains  
784 sequenced in this study will be released upon publication.

785

786

## 787 **Figure Legends**

788

### 789 **Figure 1**

790 Bayesian phylogenetic tree of *P. syringae*. The phylogeny was constructed using a concatenated  
791 alignment of seven genes (*acnB*, *fruK*, *gapA*, *gltA*, *gyrB*, *pgi* and *rpoD*). A subset of strains from the  
792 three major phylogroups were selected for analysis, with the canker-causing clades *Psm* R1, *Psm*  
793 R2 and *Pss* highlighted. Phylogroups are labelled P1-3. Strains isolated from cherry are in pink,  
794 whilst those from plum are in blue. Strains in bold were pathogenicity tested in this study. Scale bar  
795 shows substitutions per site. Bootstrap support values <99% are presented.

796

### 797 **Figure 2**

798 Percentage of trees in each disease score category after wound inoculation of *P. avium* cv. Van with  
799 different isolates of *P. syringae*: *Psm* R1, *Psm* R2, *Pss*, selected outgroup non-host strains and a no  
800 bacteria control. Data presented are the percentage of replicates (n=5) for each strain in each disease  
801 category. Disease symptoms were scored on an ordinal scale as illustrated: 1, no symptoms; 2,  
802 limited browning; 3, necrosis and gumming; 4, necrosis, gumming and spread from site of  
803 inoculation. Strains are ordered based on increasing disease score. Strains isolated from cherry are  
804 labelled in pink, whilst those from plum are in blue. Statistical Tukey-HSD (p=0.05, confidence  
805 level: 0.95) groupings of bacterial strains determined by a Proportional Odds Model (POM)  
806 analysis are presented above the bar.

807



808 **Figure 3**

809 Field inoculations of different cherry cultivars with selected strains of *P. syringae*. Data presented  
810 are the disease score and length of disease symptoms based on symptom observations six months  
811 after inoculation. A: Leaf scar inoculation. B: Wound inoculations. 1: Percentage of trees in each  
812 disease score category (colour-coded from light pink to red by score: no symptoms, browning,  
813 necrosis and gumming and necrosis, gumming and spreading from site of inoculation). 2: Boxplot  
814 of length of symptoms associated with each strain on the four cultivars. Boxplots are colour-coded  
815 for each strain based on clade *Psm* R1 (blue), *Psm* R2 (green), *Pss* (red), outgroup avirulent strains  
816 (orange) and no bacterial control (black). All data points (n=10) are presented. Strains on all plots  
817 are colour-coded based on host of isolation (cherry in pink, plum in blue and other hosts in black).  
818 For disease score POM analysis indicated that there was a significant difference between  
819 inoculation method ( $p < 0.01$ ,  $df=1$ ), between *P. syringae* strains ( $p < 0.01$ ,  $df=8$ ) and between  
820 cultivars ( $p < 0.01$ ,  $df=3$ ). For symptom length, REML analyses indicated there were significant  
821 differences between strains and cultivars for both the leaf scar and wound experiments ( $p < 0.01$ ,  
822  $df=8$  and  $p < 0.01$ ,  $df=3$  respectively). Tukey-HSD ( $p=0.05$ , confidence level: 0.95) groups are  
823 presented above each strain for each cultivar.

824

825 **Figure 4**

826 Field inoculations of different plum cultivars with selected strains of *P. syringae*. Data presented  
827 are the disease score and length of disease symptoms based on symptom observations six months  
828 after inoculation. A: Leaf scar inoculation. B: Wound inoculations. 1: Percentage of trees in each  
829 disease score category (colour-coded from light pink to red by score: No symptoms, browning,  
830 necrosis and gumming and necrosis, gumming and spreading from site of inoculation). 2: Boxplot  
831 of length of symptoms associated with each strain on the four cultivars. Boxplots are colour-coded  
832 for each strain based on clade *Psm* R1 (blue), *Psm* R2 (green), *Pss* (red), outgroup avirulent strains  
833 (orange) and no bacterial control (black). All data points (n=10) are presented. Strains on all plots

834 are colour-coded based on host of isolation (cherry in pink, plum in blue and other hosts in black).  
835 For disease score POM analysis indicated there were significant differences between inoculation  
836 method ( $p < 0.01$ ,  $df = 1$ ), strains ( $p < 0.01$ ,  $df = 8$ ) and cultivars ( $p < 0.01$ ,  $df = 1$ ). For symptom length,  
837 REML analyses indicated there were significant differences between strains in both inoculation  
838 experiments ( $p < 0.01$ ,  $df = 8$ ) but not between host cultivars ( $p = 0.20$ ,  $df = 1$  for leaf scar,  $p = 0.35$ ,  $df = 1$   
839 for wound). Tukey-HSD ( $p = 0.05$ , confidence level: 0.95) groups are presented above each strain for  
840 each cultivar.

841

## 842 **Figure 5**

843 Lesion development on cut shoots of cherry and plum cultivars following inoculation with *P.*  
844 *syringae*. A: Boxplot of percentage area of necrosis in the top 30mm associated with different *P.*  
845 *syringae* strains on four cherry cultivars. All data points for each treatment ( $n = 10$ ) are presented.  
846 The bar chart is colour-coded based on clade, *Psm* R1: blue, *Psm* R2: green, *Pss*: red, non-  
847 pathogens: orange and control: black. B: The same parameters for two different plum cultivars. C:  
848 Representative images of the symptoms on shoots inoculated with *Pss* 9097 on cv. Napoleon (1-4)  
849 or the no bacteria control (5). Strain numbers on all plots are colour-coded based on host of  
850 isolation (cherry in pink, plum in blue and other hosts in black). An ANOVA revealed there were  
851 significant differences between bacterial strains ( $p < 0.001$ ,  $df = 8$ ), no significant difference between  
852 the susceptibility of the two *Prunus* species ( $p = 0.57$ ,  $df = 1$ ) and there was a significant interaction  
853 between *Prunus* species and *P. syringae* strain ( $p < 0.01$ ,  $df = 8$ ) as well as interactions between strain  
854 and individual cultivars ( $p < 0.01$ ,  $df = 36$ ). Tukey-HSD ( $p = 0.05$ , confidence level: 0.95) significance  
855 groups for the different strains for each separate cultivar are presented above each boxplot.

856

## 857 **Figure 6**

858 Boxplot to show diameter of necrosis caused by different *P. syringae* strains on immature cherry  
859 fruits. Strains isolated from cherry and plum are highlighted in pink and blue. The bar chart is

860 colour-coded, *Psm* R1: blue, *Psm* R2: green, *Pss*: red, non-pathogens: orange and control: black. All  
861 data points for each treatment (n=5) are shown. Representative images are presented. 1: *Psm* R1, 2:  
862 *Psm* R2, 3: *Pss*, 4: non-pathogens, 5: control. An ANOVA revealed significant differences between  
863 strains ( $p < 0.01$ ,  $df = 21$ ). Tukey-HSD ( $p = 0.05$ , confidence level: 0.95) significance groups are  
864 presented above each bar.

865

## 866 **Figure 7**

867 Population counts of different strains over time on cherry cv. Van (A) and plum cv. Victoria (B)  
868 leaves. The strains isolated from cherry and plum are highlighted in pink and blue. Line colours for  
869 each strain are presented in the key. Population counts are Log CFU/ml. Data presented are the  
870 mean values (n=9), with error bars showing standard error above and below the mean. An ANOVA  
871 revealed significant differences between strains ( $p < 0.01$ ,  $df = 8$ ). Tukey-HSD ( $p = 0.05$ , confidence  
872 level: 0.95) significance groups for the different strains (based on day 10 populations) are  
873 presented.

874

## 875 **Figure 8**

876 Pathogenicity of different strains, assessed by population counts and symptom scores, on cherry and  
877 plum leaves. A: Boxplots of day 10 population counts on cherry cv. Van and plum cv. Victoria.  
878 Strains isolated from cherry are pink whilst plum are blue. Boxplots are colour-coded by clade,  
879 with *Psm* R1: blue, *Psm* R2: green, *Pss*: red, non-pathogen: orange. Data presented are all the  
880 values for each treatment of two independent experiments (n=18). ANOVAs for both cherry and  
881 plum revealed significant differences between strains ( $p < 0.01$ ,  $df = 8$ ). Tukey-HSD ( $p = 0.05$ ,  
882 confidence level: 0.95) significance groups for the different strains are presented. B: Symptom  
883 development over time. Symptoms were scored, 0: no symptoms, 1: limited browning, 2: <50%  
884 inoculated area brown, 3: >50% inoculated area brown, 4: Complete browning. Strains are colour-  
885 coded as in A. Data presented are the mean values for each treatment of two independent

886 experiments (n=8). Symptom development over time was analysed using the Area Under the  
887 Disease Progression Curve (AUDPC) analysis. ANOVAs for both cherry and plum revealed  
888 significant differences between strains ( $p < 0.01$ ,  $df=8$ ). Tukey-HSD ( $p=0.05$ , confidence level: 0.95)  
889 significance groups are presented in the table next to the plot.

890

#### 891 **Figure 9**

892 Bacterial multiplication recorded in different cherry cultivars. Boxplot of day 10 population counts  
893 of three pathogenic *P. syringae* strains on different cherry cultivars. Strains are colour-coded by  
894 clade, with *Psm* R1: blue, *Psm* R2: green, *Pss*: red. All three strains were cherry isolates so the  
895 names are coloured pink. Data presented are all the values for each treatment of two independent  
896 experiments (n=18). Tukey-HSD ( $p=0.05$ , confidence level: 0.95) significance groups for the  
897 different strains on each separate cultivar are presented. An ANOVA revealed significant  
898 differences between strains ( $p < 0.01$ ,  $df=2$ ), cultivars ( $p < 0.01$ ,  $df=3$ ) and a significant interaction  
899 ( $p < 0.01$ ,  $df=6$ ). Tukey-HSD groups comparing the different cultivars are also presented.

900

#### 901 **Figure 10**

902 Correlation of different inoculation experiments with the whole-tree wound inoculations performed  
903 in the field. The scatterplot was created using the mean standardised disease scores for each  
904 bacterial strain on cherry cv. Van. A linear model (lm) line was plotted for each experiment. The  
905 Pearson's correlation coefficients correlating the results of each experiment with the wound field  
906 inoculations are presented.

907

#### 908 **Supporting material**

909

#### 910 **Figure S1**

911 Images of immature cherry fruits inoculated with *Psm* R1 strains. Images were taken 10dpi. Five  
912 replicate cherries were inoculated per strain. Strains are colour-coded based on host of isolation as  
913 pink (cherry) or blue (plum).

914

915 **Figure S2**

916 Images of immature cherry fruits inoculated with *Psm* R2 strains. Images were taken 10dpi. Five  
917 replicate cherries were inoculated per strain. Strains are colour-coded based on host of isolation as  
918 pink (cherry).

919

920 **Figure S3**

921 Images of immature cherry fruits inoculated with *Pss* strains. Images were taken 10dpi. Five  
922 replicate cherries were inoculated per strain. Strains are colour-coded based on host of isolation as  
923 pink (cherry) or blue (plum).

924

925 **Figure S4**

926 Images of immature cherry fruits inoculated with non-pathogen strains and a no-bacteria control.  
927 Images were taken 10dpi. Five replicate cherries were inoculated per strain.

928

929 **Figure S5**

930 Boxplot of diameter of necrosis caused by cherry pathogens on four cherry cultivars using  
931 immature green cherry fruits. Strains are colour-coded with those isolated from cherry in pink and  
932 the no bacterial control in black. The boxplots are colour-coded by clade: *Psm* R1: blue, *Psm* R2:  
933 green, *Pss*: red and no bacteria control: black. Data presented are all values (n=20) per treatment of  
934 two independent experiments. An ANOVA revealed significant differences between strains  
935 ( $p < 0.01$ ,  $df=3$ ), cultivars ( $p < 0.01$ ,  $df=3$ ) and a significant interaction ( $p < 0.01$ ,  $df=9$ ). Tukey-HSD

936 (p=0.05, confidence level: 0.95) significance groups for the different strains for each separate  
937 cultivar are presented above each boxplot.

938  
939

#### 940 **Figure S6**

941 Symptoms observed in detached cherry leaves using different inoculation methods. Representative  
942 images of the four methods – infiltration, stab, droplet and wound + droplet. Leaves show  
943 inoculation with *Psm* R1-5244 or a 10mM MgCl<sub>2</sub> control.

944

#### 945 **Figure S7**

946 Boxplot of day 10 population counts of all strains used in this study on cherry cv. Van leaves.  
947 Strains are colour-coded with those isolated from cherry in pink, plum in blue and non-pathogens in  
948 black. The boxplots are coloured by clade: *Psm* R1: blue, *Psm* R2: green, *Pss*: red. The 10mM  
949 MgCl<sub>2</sub> control is not included as no bacteria were found. The data presented are all values for each  
950 treatment (n=9). An ANOVA revealed significant differences between strains (p<0.01, df=20).  
951 Tukey-HSD (p=0.05, confidence level: 0.95) significance groups for the different strains are  
952 presented.

953

#### 954 **Figure S8**

955 Symptom development over time after inoculation of various *P. syringae* strains in cherry cv. Van  
956 at different concentrations. Strains are colour-coded, with those isolated from cherry in pink and  
957 plum in blue. Symptoms were scored from 0-5. 0: no symptoms, 1: limited browning, 2: browning  
958 <50% of inoculated site, 3: browning >50% of inoculated site, 4: Complete browning, 5: Spread  
959 from site of inoculation. Data presented are the means (n=4) and error bars show the standard error  
960 above and below the mean. The lines for each strains are colour-coded with *Psm* R1: blue, *Psm* R2:  
961 green, *Pss*: red, non-pathogen RMA1: orange. Symptom development over time was analysed using  
962 AUDPC. An ANOVA revealed significant differences between strains (p<0.01, df=4),

963 concentrations ( $p < 0.01$ ,  $df = 3$ ) and a significant interaction ( $p < 0.01$ ,  $df = 12$ ). Tukey-HSD ( $p = 0.05$ ,  
964 confidence level: 0.95) significance groups are presented.

965

966

967 **Figure S9**

968 TEM images of *Psm* R2-leaf in a detached cherry leaf one week after inoculation. Arrows point to  
969 putative papilla formation in the plant cell wall next to a bacterial colony containing dead bacterial  
970 cells. A: Bacteria inhabiting apoplastic space next to cells. Note that no cell wall alterations  
971 appeared in the plant cells. B: Cell wall alterations (papilla formation) shown by arrows in plant  
972 cells. C: A bacterial colony containing dead and alive bacteria next to plant cells.

973

974 **Figure S10**

975 Images of symptom development over time on cherry and plum. A: Cherry cv. Van, B: Plum cv.  
976 Victoria. The same leaf was imaged 16, 24, 48 and 72hpi. Arrows indicate the first appearance of  
977 symptoms for that particular strain. Strains are labelled: 1: *Psm* R1-5244, 2: *Psm* R1-5300, 3: *Psm*  
978 R2-leaf, 4: *Ps*-9643, 5: *Pss*-9097, 6: *Pss*-9293, 7: RMA1, 8: *Psav*, 9: *Pph*, C: No bacteria control

979

980 **Table S1**

981 Proportional Odds Model (POM) analysis of the glasshouse whole-tree wound inoculations. Model  
982 comparisons are first shown with the ANOVA comparing models. The summary of the final model  
983 (score  $\sim g1$ ) is shown along with lsmeans Tukey-HSD groupings of strains (corresponds to  
984 groupings on Figure 2).

985

986 **Table S2**

987 REML analysis of field inoculation of cherry inoculated by leaf scar. The REML model and  
988 ANOVA are presented, followed by lsmean Tukey-HSD groupings for cultivars, strains and then  
989 strains on each cultivar (corresponds to groupings on Figure 3).

990

991 **Table S3**

992 REML analysis of field inoculation of cherry inoculated by wound. The REML model and ANOVA  
993 are presented, followed by lsmean Tukey-HSD groupings for cultivars, strains and then strains on  
994 each cultivar (corresponds to groupings on Figure 3).

995

996 **Table S4**

997 REML analysis of field inoculation of plum inoculated by leaf scar. The REML model and  
998 ANOVA are presented, followed by lsmean Tukey-HSD groupings for strains and then strains on  
999 each cultivar (corresponds to groupings on Figure 4).

1000

1001 **Table S5**

1002 REML analysis of field inoculation of plum inoculated by wound. The REML model and ANOVA  
1003 are presented, followed by lsmean Tukey-HSD groupings for strains and then strains on each  
1004 cultivar (corresponds to groupings on Figure 4).

1005

1006 **Table S6**

1007 POM analysis of the cherry field inoculations. Model comparisons are first shown with the  
1008 ANOVA comparing models. The summary of the final model (score~strain+cv+ino+block) is then  
1009 presented.

1010

1011 **Table S7**



1012 Lsmean Tukey-HSD groupings for different treatment combinations from the POM analysis of  
1013 cherry field inoculations. Groups for strains on different cultivars are presented (corresponds to  
1014 groupings on Figure 3), followed by groupings of cultivars in each inoculation method and then  
1015 strains across the two inoculation methods.

1016

1017 **Table S8**

1018 POM analysis of the plum field inoculations. Model comparisons are first shown with the ANOVA  
1019 comparing models. The summary of the final model (score~strain+cv+ino+block) is then presented.

1020

1021 **Table S9**

1022 Lsmeans Tukey-HSD groupings for different treatment combinations from the POM analysis of  
1023 plum field inoculations. Groups for strains on different cultivars are presented (corresponds to  
1024 groupings on Figure 3), followed by groupings of cultivars in each inoculation method and then  
1025 strains across the two inoculation methods.

1026

1027 **Table S10**

1028 ANOVA table of cut shoot inoculations followed by lsmeans Tukey-HSD groupings for the strains  
1029 on each cultivar (corresponds to groupings on Figure 5).

1030

1031 **Table S11**

1032 ANOVA table of immature cherry fruit inoculations of all isolates followed by Tukey-HSD  
1033 groupings for the strains extracted using the agricolae package function HSD.test (corresponds to  
1034 groupings on Figure 6).

1035

1036 **Table S12**

1037 REML analysis of immature cherry fruit inoculations where different bacterial strains were  
1038 inoculated onto different host cultivars. The REML model is presented. Lsmeans Tukey-HSD  
1039 groups for strains on different cultivars are presented (corresponds to groupings on Figure S5),  
1040 followed by groupings based on all possible treatments.

1041

1042 **Table S13**

1043 ANOVA table of day 10 leaf population counts of different bacterial strains inoculated on cherry  
1044 and plum. Tukey-HSD groups for strains are presented (corresponds to groupings on Figure 7).

1045

1046 **Table S14**

1047 REML analysis of day 10 leaf population counts of reference bacterial strains inoculated on cherry  
1048 leaves. The model is shown followed by ANOVA table. Lsmeans Tukey-HSD groups for strains are  
1049 presented (corresponds to groupings on Figure 8).

1050

1051 **Table S15**

1052 REML analysis of day 10 leaf population counts of reference bacterial strains inoculated on plum  
1053 leaves. The model is shown followed by ANOVA table. Lsmeans Tukey-HSD groups for strains are  
1054 presented (corresponds to groupings on Figure 8).

1055

1056 **Table S16**

1057 ANOVA table of AUDPC analysis of leaf symptom score over time of different bacterial strains  
1058 inoculated on cherry. Tukey-HSD groups for strains are presented (corresponds to groupings on  
1059 Figure 8).

1060

1061 **Table S17**

1062 ANOVA table of AUDPC analysis of leaf symptom score over time of different bacterial strains  
1063 inoculated on cherry. Tukey-HSD groups for strains are presented (corresponds to groupings on  
1064 Figure 8).

1065

1066 **Table S18**

1067 ANOVA table of day 10 leaf population counts of different bacterial strains inoculated on different  
1068 cherry cultivars. Tukey-HSD groups for strains are presented (corresponds to groupings on Figure  
1069 9).

1070

1071 **Table S19**

1072 ANOVA table of leaf population counts of all isolates used in this study, followed by Tukey-HSD  
1073 groupings for the strains extracted using the agricolae package function HSD.test (corresponds to  
1074 groupings on Figure S7).

1075

1076 **Table S20**

1077 ANOVA table of AUDPC analysis of symptom score on leaves of several bacterial strains  
1078 inoculated at different concentrations. This is followed by lsmeans Tukey-HSD groupings for the  
1079 strains (corresponds to groupings on Figure S8).

1080

1081

1082

1083

1084

1085

1086

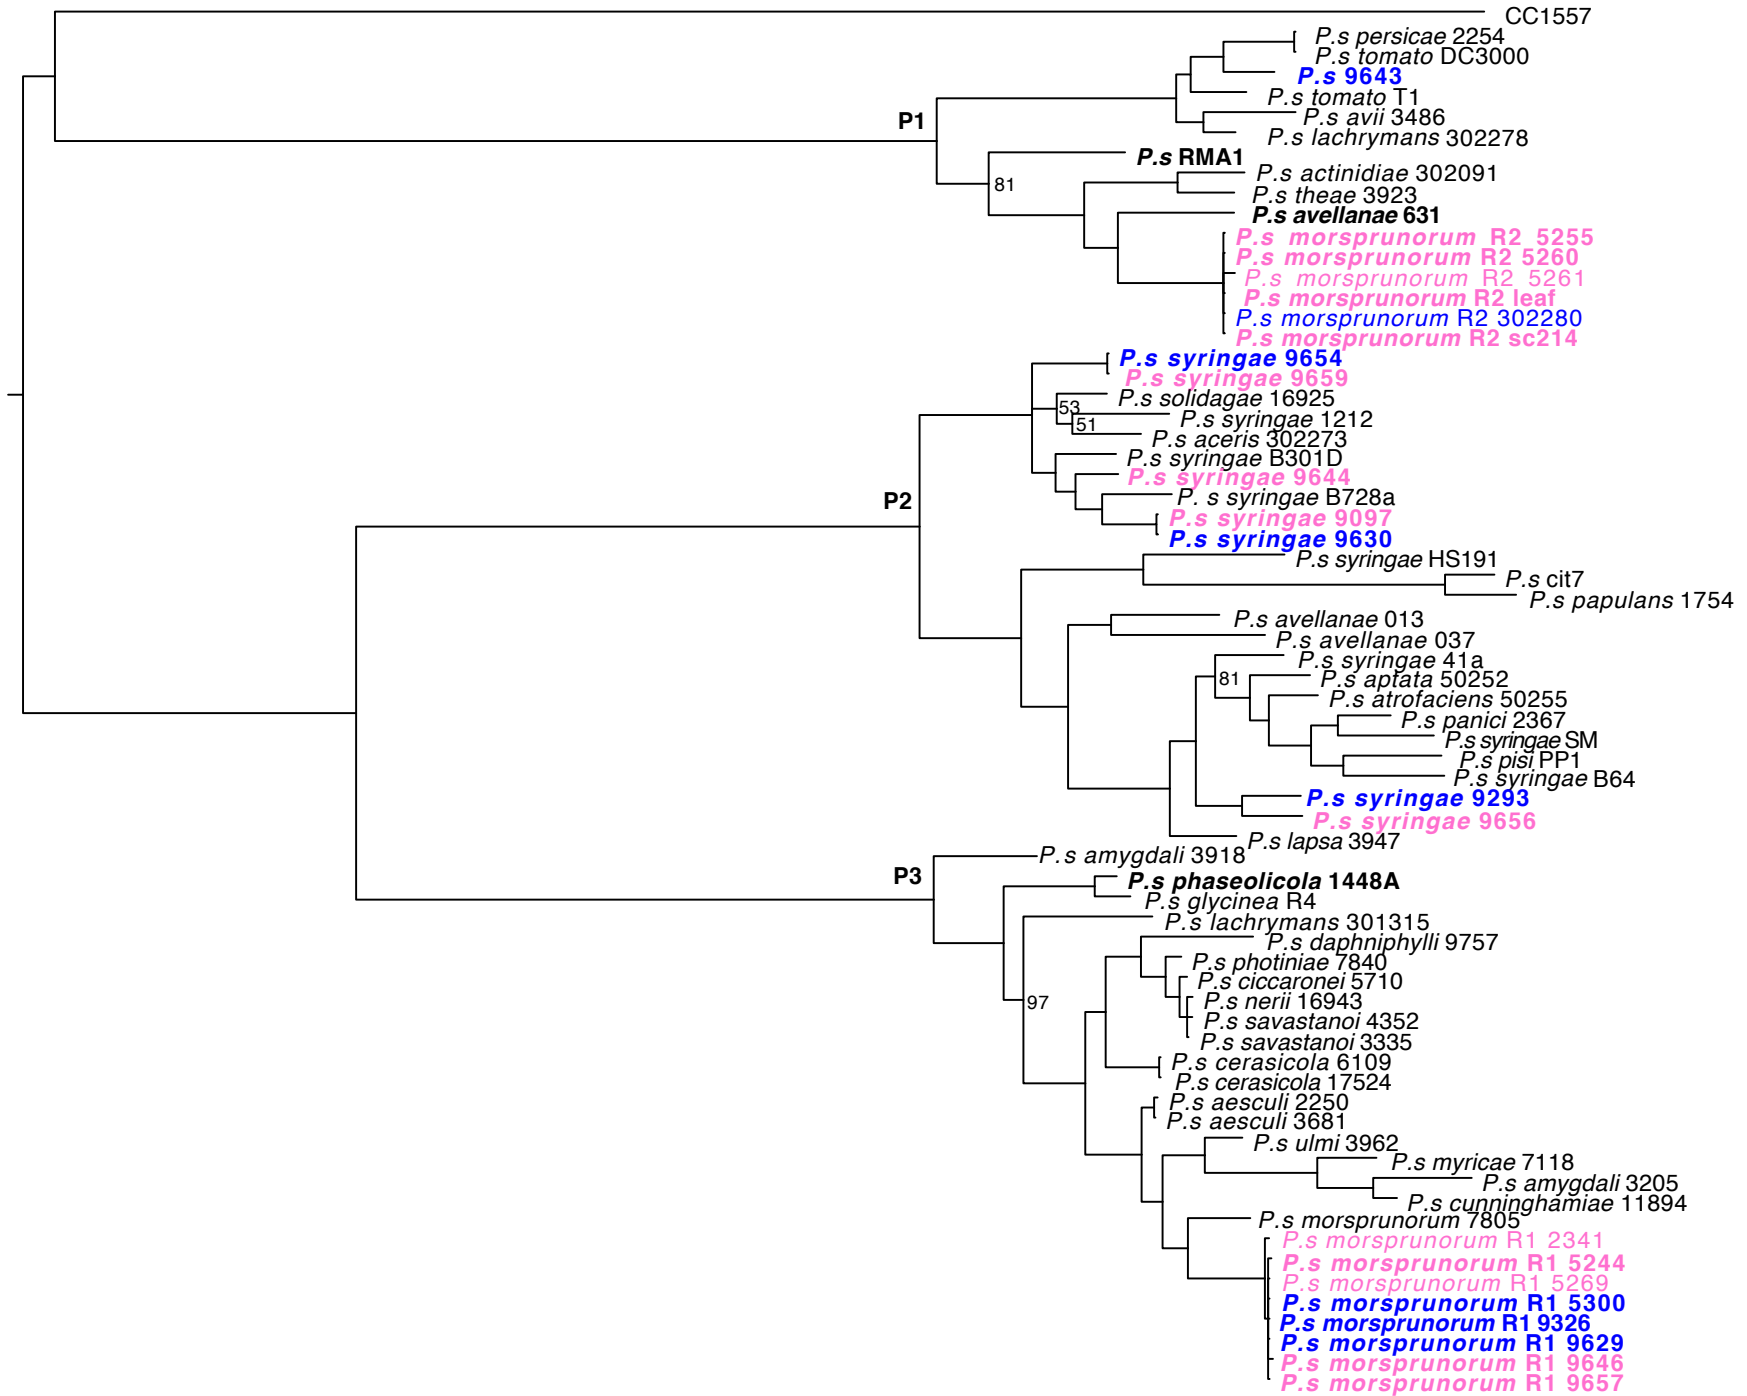

0.009

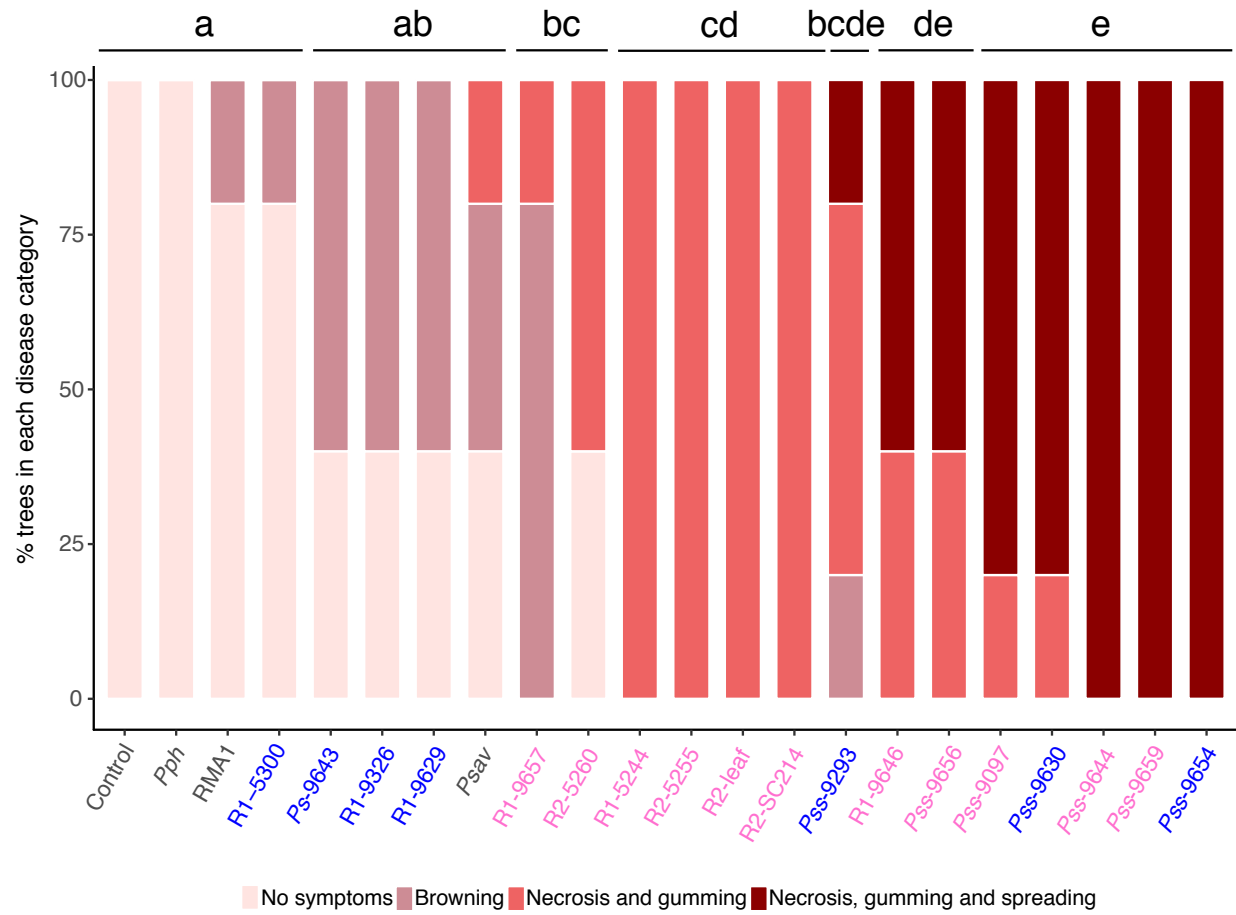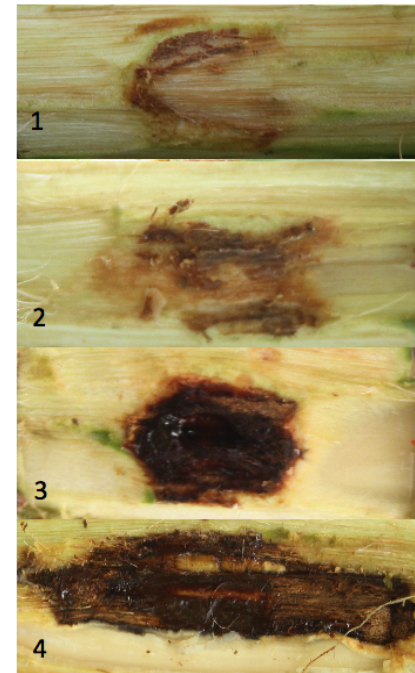

A1

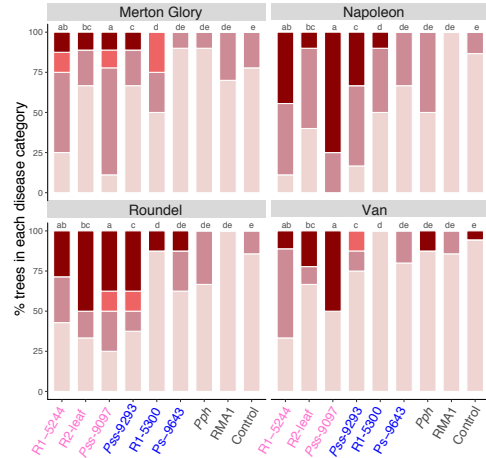

B1

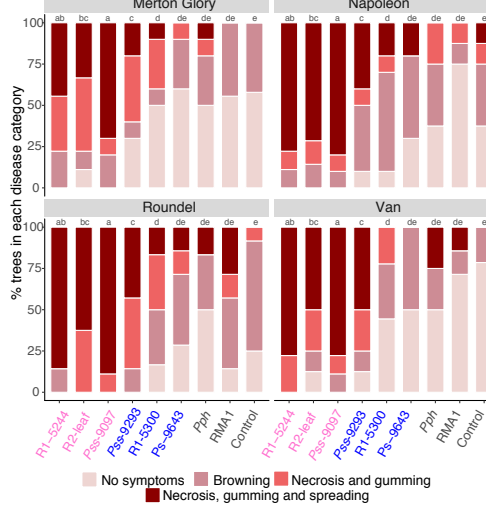

A2

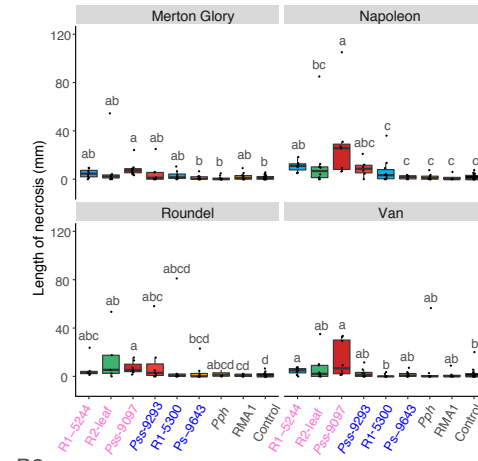

B2

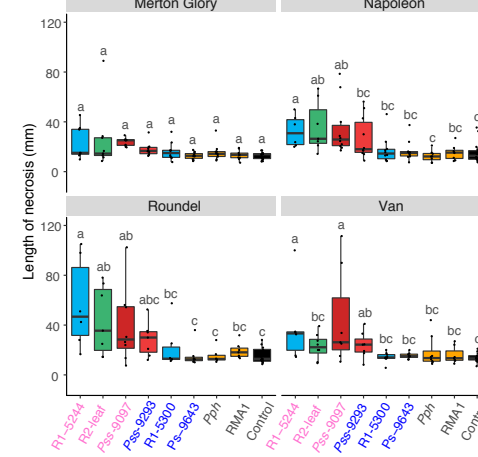

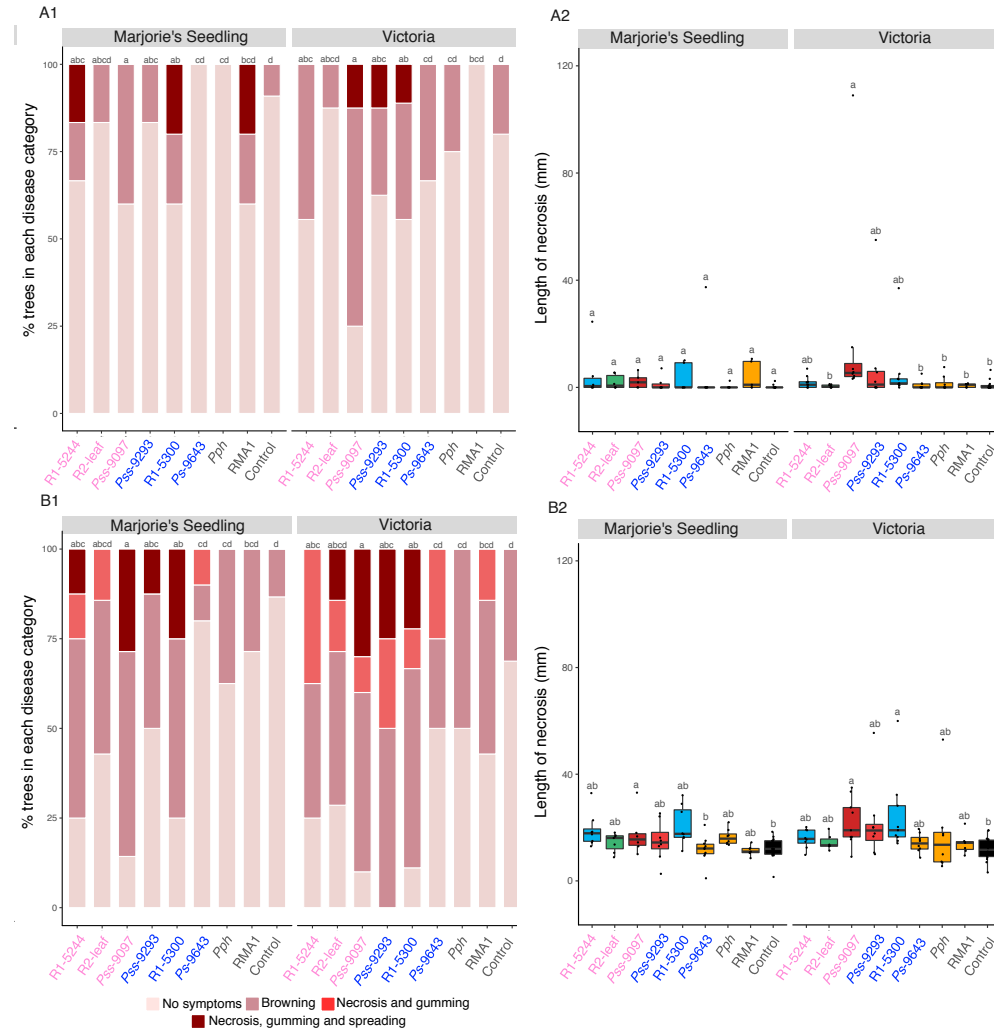

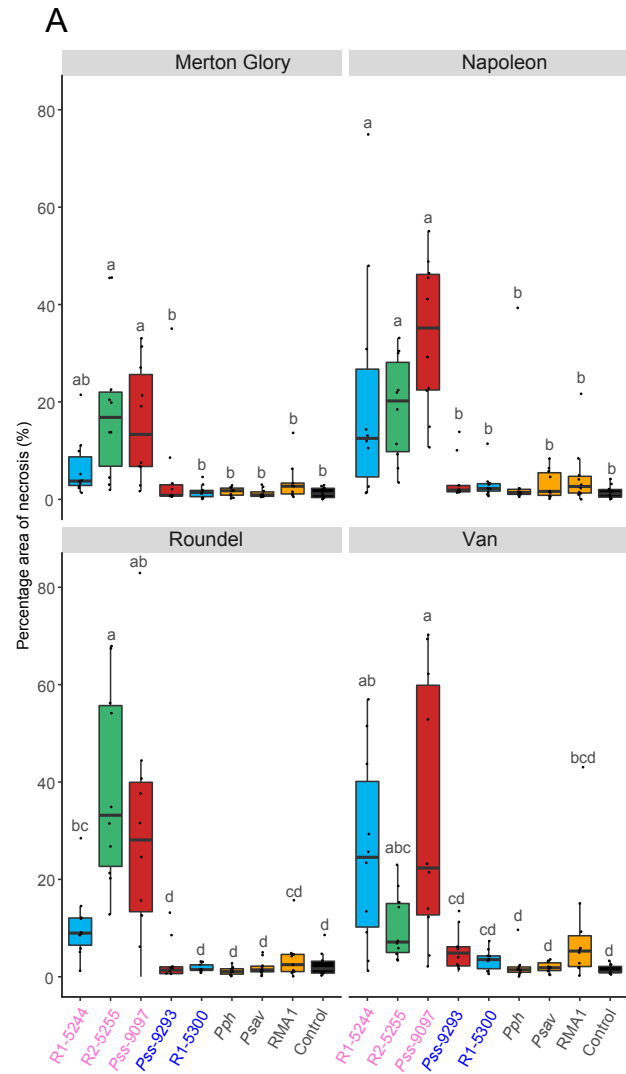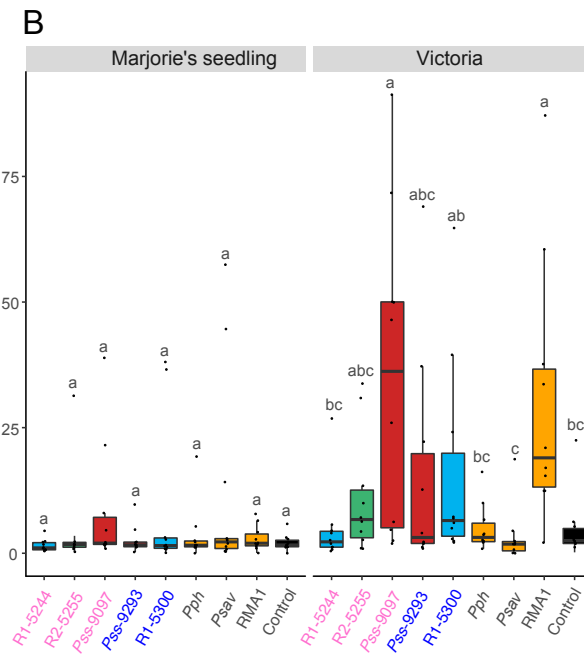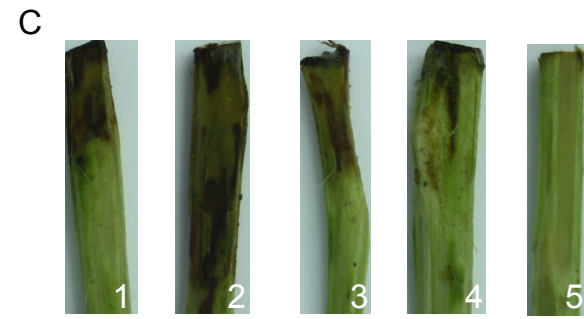



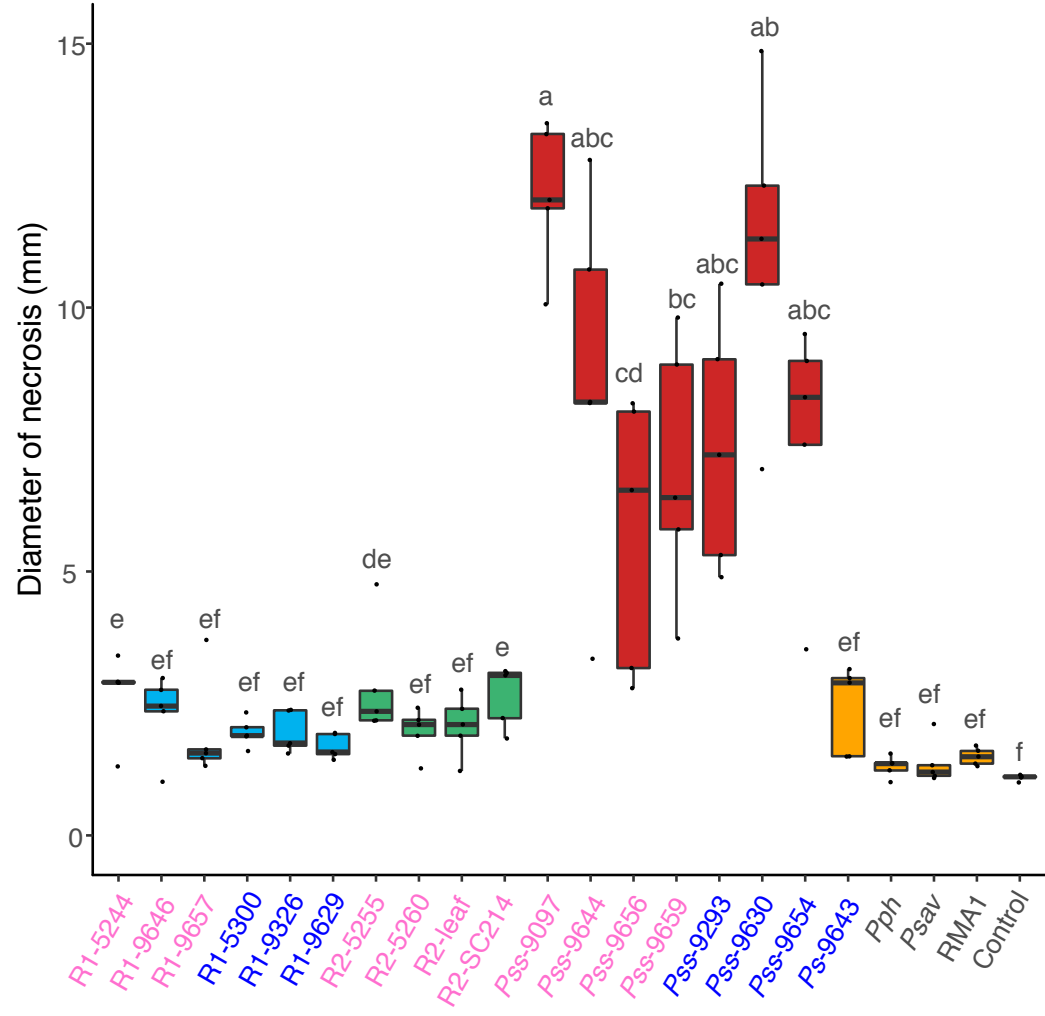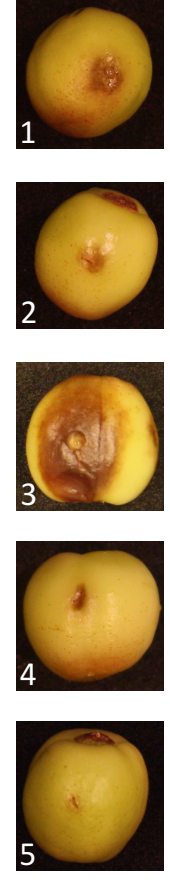

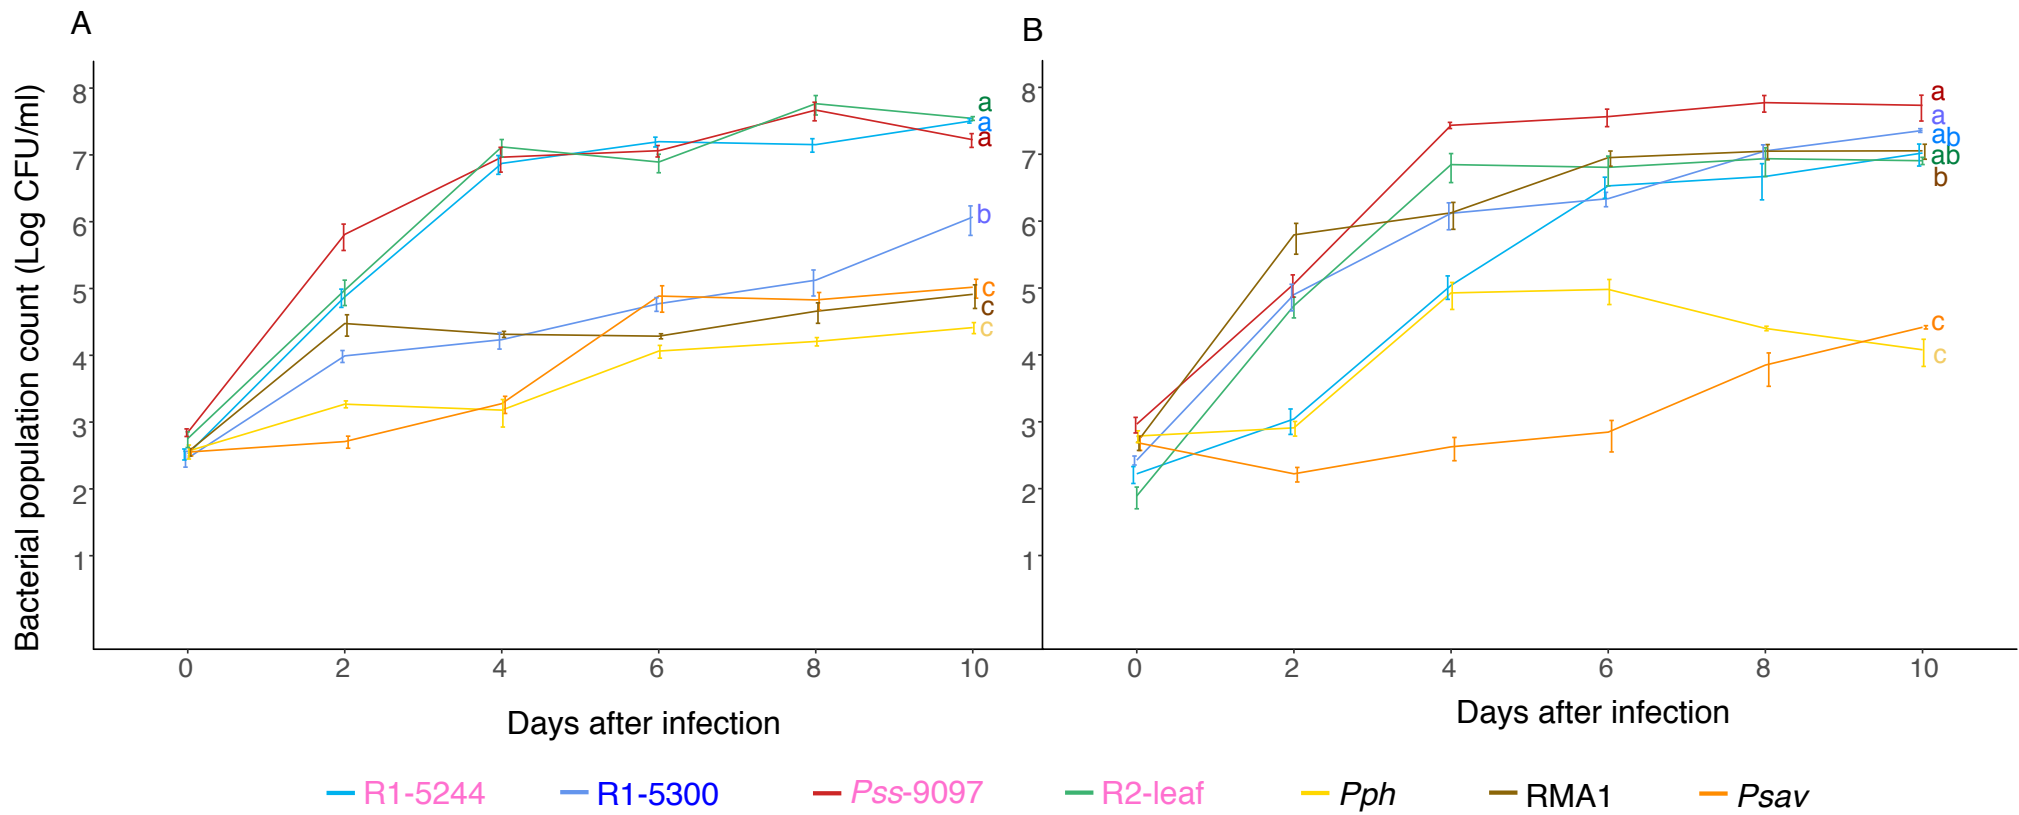

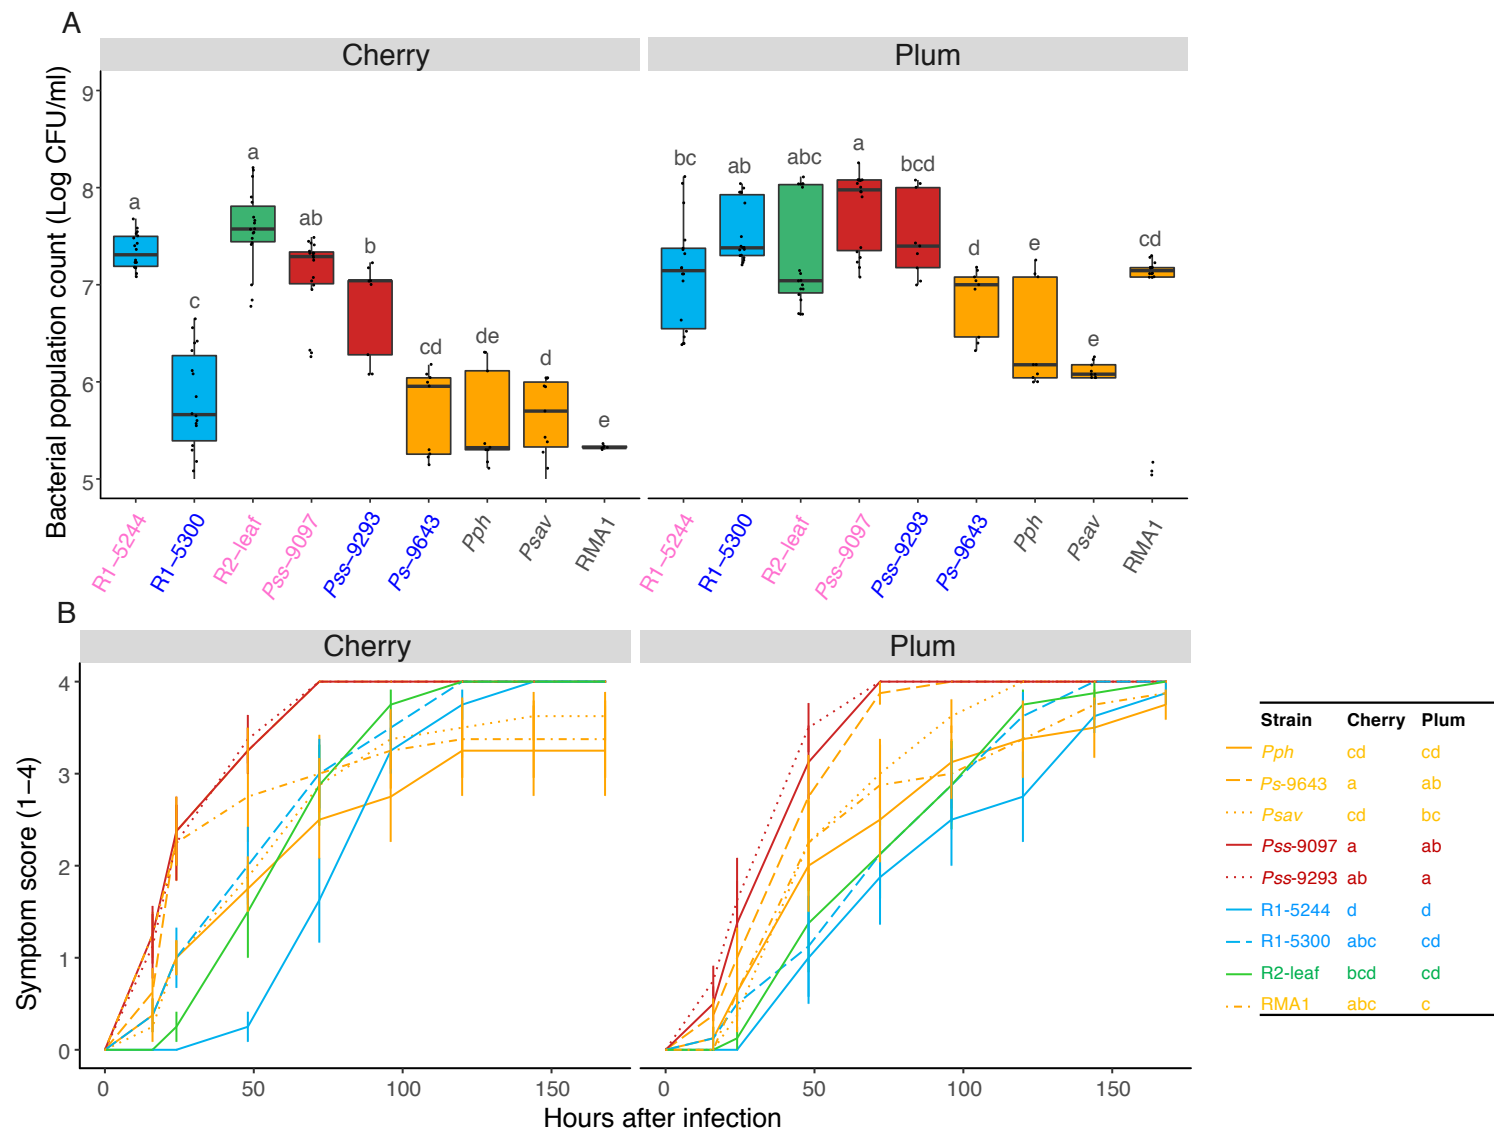

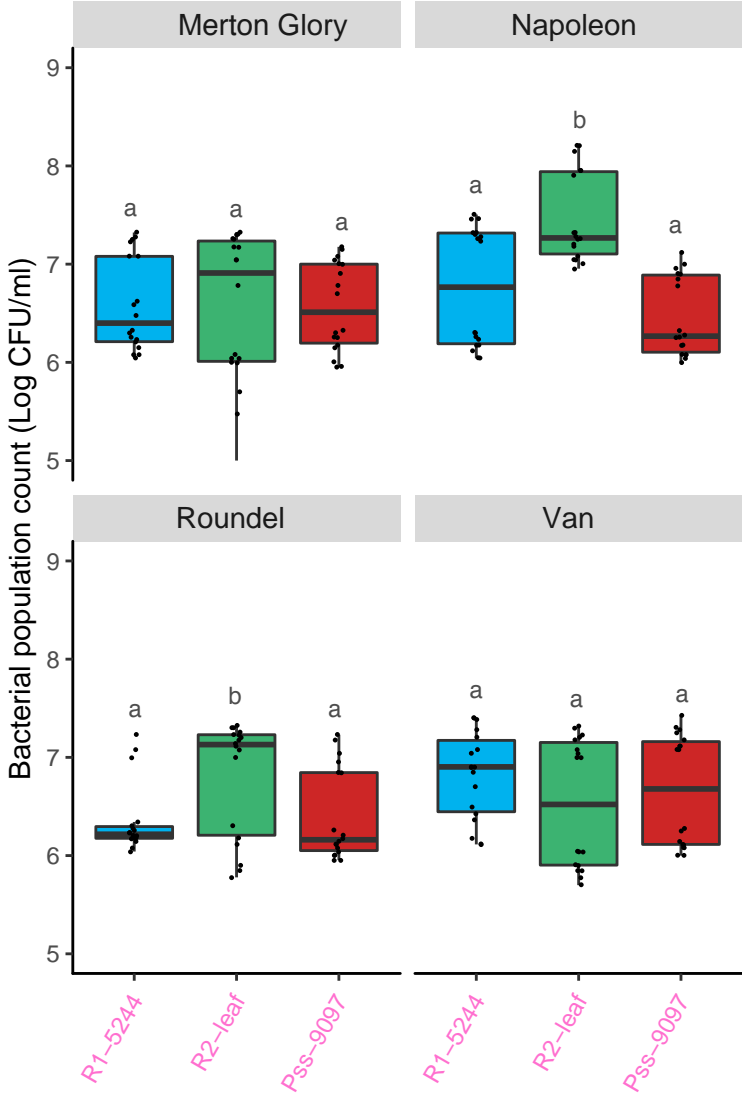

Wound standardised disease score

2  
1  
0  
-1

-1

Standardised disease score

0

1

2

$r=0.93$

$r=0.763$

$r=0.773$

$r=0.373$

**Experiment**

- Fruit
- Leaf populations
- Leaf scar
- Cut shoot

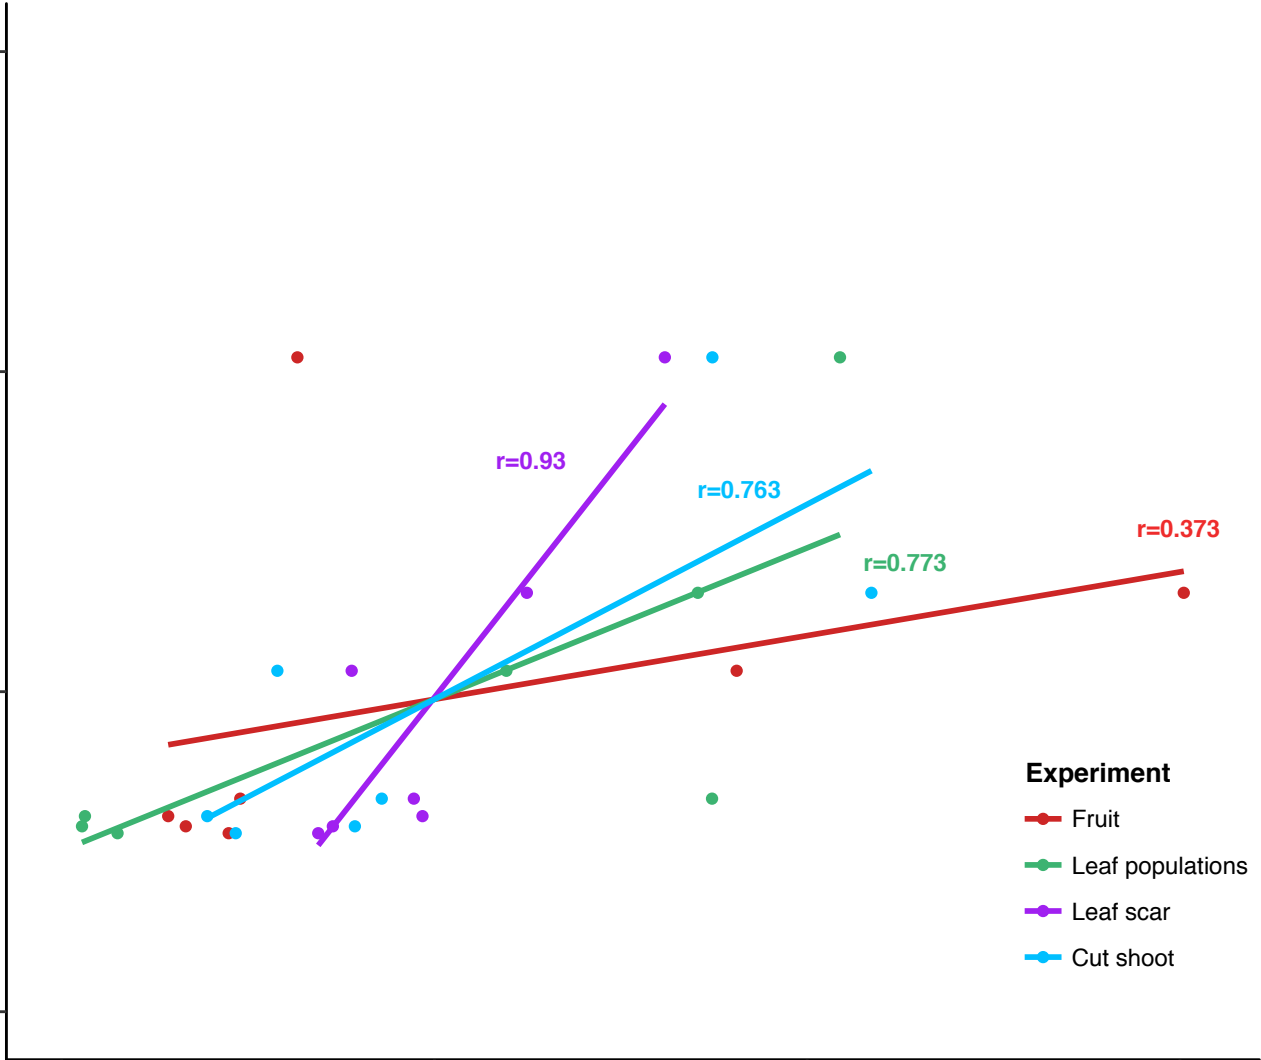

| Strain    | Pathovar            | Race | Host/Isolation source     | <i>Prunus</i> host cv. | Host tissue    | Reference                  | BioProject/accession |
|-----------|---------------------|------|---------------------------|------------------------|----------------|----------------------------|----------------------|
| R1-5244   | <i>morsprunorum</i> | 1    | <i>Prunus avium</i>       | unknown                | Cankerous wood | This study                 | PRJNA345357          |
| R1-5300   | <i>morsprunorum</i> | 1    | <i>Prunus domestica</i>   | Victoria               | Unknown        | This study                 | PRJNA345357          |
| R1-9326   | <i>morsprunorum</i> | 1    | <i>Prunus domestica</i>   | Victoria               | Leaf wash      | This study                 | PRJNA345357          |
| R1-9629   | <i>morsprunorum</i> | 1    | <i>Prunus domestica</i>   | Victoria               | Leaf wash      | This study                 | PRJNA345357          |
| R1-9646   | <i>morsprunorum</i> | 1    | <i>Prunus avium</i>       | Stella                 | Leaf wash      | This study                 | PRJNA345357          |
| R1-9657   | <i>morsprunorum</i> | 1    | <i>Prunus domestica</i>   | Victoria               | Leaf wash      | This study                 | PRJNA345357          |
| R2-5255   | <i>morsprunorum</i> | 2    | <i>Prunus avium</i>       | Napoleon               | Unknown        | This study                 | PRJNA345357          |
| R2-5260   | <i>morsprunorum</i> | 2    | <i>Prunus avium</i>       | Roundel                | Unknown        | This study                 | PRJNA345357          |
| R2-leaf   | <i>morsprunorum</i> | 2    | <i>Prunus avium</i>       | Napoleon               | Leaf lesion    | This study                 | PRJNA345357          |
| R2-SC214  | <i>morsprunorum</i> | 2    | <i>Prunus avium</i>       | Wild cherry            | Leaf lesion    | This study                 | PRJNA345357          |
| syr9097   | <i>syringae</i>     |      | <i>Prunus avium</i>       | unknown                | Cankerous wood | This study                 | PRJNA345357          |
| syr9293   | <i>syringae</i>     |      | <i>Prunus domestica</i>   | Victoria               | Leaf wash      | This study                 | PRJNA345357          |
| syr9630   | <i>syringae</i>     |      | <i>Prunus domestica</i>   | Victoria               | Leaf wash      | This study                 | PRJNA345357          |
| syr9644   | <i>syringae</i>     |      | <i>Prunus avium</i>       | Stella                 | Leaf wash      | This study                 | PRJNA345357          |
| syr9654   | <i>syringae</i>     |      | <i>Prunus domestica</i>   | Victoria               | Leaf wash      | This study                 | PRJNA345357          |
| syr9656   | <i>syringae</i>     |      | <i>Prunus avium</i>       | Kiku-Shidare           | Leaf wash      | This study                 | PRJNA345357          |
| syr9659   | <i>syringae</i>     |      | <i>Prunus avium</i>       | Kiku-Shidare           | Leaf wash      | This study                 | PRJNA345357          |
| Ps-9643   | -                   |      | <i>Prunus domestica</i>   | Victoria               | Leaf wash      | This study                 | PRJNA345357          |
| RMA1      | -                   |      | <i>Aquilegia vulgaris</i> | Winky                  | Leaf lesion    | This study                 | PRJNA345357          |
| PsavBP631 | <i>avellanae</i>    |      | <i>Corylus avellana</i>   |                        |                | O'Brien <i>et al.</i> 2012 | AKBS00000000         |
| Pph1448a  | <i>phaseolicola</i> |      | <i>Phaseolus vulgaris</i> |                        |                | Joardar <i>et al.</i> 2005 | CP000058             |

| Strain        | Pathovar             | Race | Host/Isolate source                     | <i>Prunus</i><br>Host cv. | Reference                  | BioProject/accession |
|---------------|----------------------|------|-----------------------------------------|---------------------------|----------------------------|----------------------|
| acer302273    | <i>aceris</i>        |      | <i>Acer</i> sp.                         |                           | Baltrus <i>et al.</i> 2012 | AEAO00000000         |
| act302091     | <i>actinidiae</i>    |      | <i>Actinidia deliciosa</i>              |                           | Baltrus <i>et al.</i> 2012 | AEAL00000000         |
| aes2250       | <i>aesculi</i>       |      | <i>Aesculus</i><br><i>hippocastanum</i> |                           | Green <i>et al.</i> 2010   | ACXT00000000         |
| aes3681       | <i>aesculi</i>       |      | <i>Aesculus</i><br><i>hippocastanum</i> |                           | Green <i>et al.</i> 2010   | ACXS00000000         |
| amy3205       | <i>amygdali</i>      |      | <i>Prunus dulcis</i>                    |                           | Bartoli <i>et al.</i> 2015 | JYHB00000000         |
| amyICMP3918   | <i>amygdali</i>      |      | <i>Prunus dulcis</i>                    |                           | Thakur <i>et al.</i> 2016  | LJPQ00000000         |
| atroDSM50255  | <i>atrofaciens</i>   |      | <i>Triticum aestivum</i>                |                           | Baltrus <i>et al.</i> 2014 | AWUI00000000         |
| aveIVe013     | <i>avellanae</i>     |      | <i>Corylus avellana</i>                 |                           | O'Brien <i>et al.</i> 2012 | AKCK00000000         |
| aveIVe037     | <i>avellanae</i>     |      | <i>Corylus avellana</i>                 |                           | O'Brien <i>et al.</i> 2012 | AKCJ00000000         |
| avii3846      | <i>avii</i>          |      | <i>Prunus avium</i>                     |                           | Nowell <i>et al.</i> 2016  | LIJ00000000          |
| castCFBP4217  | <i>castaneae</i>     |      | <i>Castanea crenata</i>                 |                           | Nowell <i>et al.</i> 2016  | LIH00000000          |
| CC1557        | -                    |      | Snow                                    |                           | Hockett <i>et al.</i> 2014 | AVEH00000000         |
| cera6109      | <i>cerasicola</i>    |      | <i>Prunus yedoensis</i>                 |                           | Nowell <i>et al.</i> 2016  | LIIG00000000         |
| ceraICMP17524 | <i>cerasicola</i>    |      | <i>Prunus yedoensis</i>                 |                           | Thakur <i>et al.</i> 2016  | LJQA00000000         |
| ciccICMP5710  | <i>ciccaronei</i>    |      | <i>Cerantonia siliqua</i>               |                           | Thakur <i>et al.</i> 2016  | LJPY00000000         |
| cit7          | -                    |      | <i>Citrus sinensis</i>                  |                           | Baltrus <i>et al.</i> 2012 | AEAJ00000000         |
| cunnICMP11894 | <i>cunninghamiae</i> |      | <i>Cunninghamia lanceolata</i>          |                           | Thakur <i>et al.</i> 2016  | LJQE00000000         |
| daphICMP9757  | <i>daphniphylli</i>  |      | <i>Daphniphyllum teijsmannii</i>        |                           | Thakur <i>et al.</i> 2016  | LJQF00000000         |
| glyR4         | <i>glycinea</i>      |      | <i>Glycine max</i>                      |                           | Qi <i>et al.</i> 2011      | AEGH00000000         |
| lach301315    | <i>lachrymans</i>    |      | <i>Cucumis sativus</i>                  |                           | Baltrus <i>et al.</i> 2012 | AEAF00000000         |
| lach302278    | <i>lachrymans</i>    |      | <i>Cucumis sativus</i>                  |                           | Baltrus <i>et al.</i> 2012 | AEAM00000000         |
| lapsaICMP3947 | <i>lapsa</i>         |      | <i>Zea</i> sp.                          |                           | Thakur <i>et al.</i> 2016  | LJQQ00000000         |
| mors302280    | <i>morsprunorum</i>  |      | <i>Prunus domestica</i>                 |                           | Baltrus <i>et al.</i> 2012 | AEAE00000000         |
| morsU7805     | <i>morsprunorum</i>  |      | <i>Prunus mume</i>                      |                           | Mott <i>et al.</i> 2016    | LGLQ00000000         |
| Strain        | Pathovar             | Race | Host/Isolate source                     | <i>Prunus</i><br>Host cv. | Reference                  | BioProject/accession |

|                |                     |   |                             |         |                                         |              |
|----------------|---------------------|---|-----------------------------|---------|-----------------------------------------|--------------|
| myriICMP7118   | <i>myricae</i>      |   | <i>Myrica rubra</i>         |         | Thakur <i>et al.</i> 2016               | LJQV00000000 |
| neriiICMP16943 | <i>savastanoi</i>   |   | <i>Olea europea</i>         |         | Thakur <i>et al.</i> 2016               | LJQW00000000 |
| paniLMG2367    | <i>panici</i>       |   | <i>Panicum miliaceum</i>    |         | Liu <i>et al.</i> 2012                  | ALAC00000000 |
| papu1754       | <i>papulans</i>     |   | <i>Malus sylvestris</i>     |         | Nowell <i>et al.</i> 2016               | JYHI00000000 |
| persNCPB2254   | <i>persicae</i>     |   | <i>Prunus persica</i>       |         | Zhao <i>et al.</i> 2015                 | LAZV00000000 |
| photICMP7840   | <i>photiniae</i>    |   | <i>Photinia glabra</i>      |         | Thakur <i>et al.</i> 2016               | LJQO00000000 |
| pisiPP1        | <i>pisi</i>         |   | <i>Pisum sativum</i>        |         | Baltrus <i>et al.</i> 2014b             | AUZR00000000 |
| R1-2341        | <i>morsprunorum</i> | 1 | <i>Prunus cerasus</i>       | unknown | Nowell <i>et al.</i> 2016               | LIIB00000000 |
| R1-5269        | <i>morsprunorum</i> | 1 | <i>Prunus cerasus</i>       | unknown | Nowell <i>et al.</i> 2016               | LIHZ00000000 |
| R2-5261        | <i>morsprunorum</i> | 2 | <i>Prunus avium</i>         | Roundel | Nowell <i>et al.</i> 2016               | LIIA00000000 |
| sava3335       | <i>savastanoi</i>   |   | <i>Olea europea</i>         |         | Rodriguez-Palenzuela <i>et al.</i> 2010 | ADMI00000000 |
| sava4352       | <i>savastanoi</i>   |   | <i>Olea europea</i>         |         | Thakur <i>et al.</i> 2016               | LGKR00000000 |
| soliICMP16925  | <i>solidagae</i>    |   | <i>Solidago altissima</i>   |         | Thakur <i>et al.</i> 2016               | JYHF00000000 |
| syr1212        | <i>syringae</i>     |   | <i>Pisum sativum</i>        |         | Baltrus <i>et al.</i> 2014              | AVCR00000000 |
| syr41a         | <i>syringae</i>     |   | <i>Prunus armeniaca</i>     |         | Bartoli <i>et al.</i> 2015              | JYHJ00000000 |
| syrB301D       | <i>syringae</i>     |   | <i>Pyrus communis</i>       |         | Ravindran <i>et al.</i> 2015            | CP005969     |
| syrB64         | <i>syringae</i>     |   | <i>Triticum aestivum</i>    |         | Dudnik and Dudler 2013                  | ANZF00000000 |
| syrB728a       | <i>syringae</i>     |   | <i>Phaseolus vulgaris</i>   |         | Feil <i>et al.</i> 2005                 | CP000075     |
| syrHS191       | <i>syringae</i>     |   | <i>Panicum miliaceum</i>    |         | Ravindran <i>et al.</i> 2015            | CP006256     |
| syrSM          | <i>syringae</i>     |   | <i>Triticum aestivum</i>    |         | Dudnik and Dudler 2013                  | APWT00000000 |
| thea3923       | <i>theae</i>        |   | <i>Camelia sinensis</i>     |         | Mazzaglia <i>et al.</i> 2012            | AGNN00000000 |
| tomDC3000      | <i>tomato</i>       |   | <i>Solanum lycopersicum</i> |         | Buell <i>et al.</i> 2003                | AE016853     |
| tomT1          | <i>tomato</i>       |   | <i>Solanum lycopersicum</i> |         | Almeida <i>et al.</i> 2009              | ABSM00000000 |
| ulmiICMP3962   | <i>ulmi</i>         |   | <i>Ulmus sp.</i>            |         | Thakur <i>et al.</i> 2016               | LJRQ00000000 |
